1

2

3 **Redundant *SCARECROW* genes pattern distinct cell layers in**  
4 **roots and leaves of maize**

5

6 **Thomas E. Hughes<sup>1</sup>, Olga V. Sedelnikova<sup>1,3</sup>, Hao Wu<sup>2</sup>, Philip W. Becraft<sup>2</sup>, Jane A. Langdale<sup>1\*</sup>**

7

8

9 <sup>1</sup> Department of Plant Sciences, University of Oxford, South Parks Road, Oxford, UK, OX1 3RB

10 <sup>2</sup> Genetics, Development, and Cell Biology Department, Iowa State University, Ames, Iowa, USA,  
11 50011

12 <sup>3</sup> Current address: Syngenta Jealott's Hill International Research Centre, Bracknell RG42 6EY

13

14 \*Corresponding author: [jane.langdale@plants.ox.ac.uk](mailto:jane.langdale@plants.ox.ac.uk)

15

16 Keywords: Radial-patterning, *SCARECROW*, Kranz, Mesophyll, Bundle-sheath, Maize

17

18 Summary statement: Two duplicated maize *SCARECROW* genes control the development of the  
19 endodermis in roots and the mesophyll in leaves

20 **ABSTRACT**

21 The highly efficient C<sub>4</sub> photosynthetic pathway is facilitated by 'Kranz' leaf anatomy. In Kranz leaves,  
22 closely spaced veins are encircled by concentric layers of photosynthetic bundle sheath (inner) and  
23 mesophyll (outer) cells. Here we demonstrate that in the C<sub>4</sub> monocot maize, Kranz patterning is  
24 regulated by redundant function of SCARECROW 1 (ZmSCR1) and a previously uncharacterized  
25 homeolog ZmSCR1h. *ZmSCR1* and *ZmSCR1h* transcripts accumulate in ground meristem cells of  
26 developing leaf primordia and in *Zmscr1;Zmscr1h* mutant leaves, most veins are separated by one  
27 rather than two mesophyll cells; many veins have sclerenchyma above and/or below instead of  
28 mesophyll cells; and supernumerary bundle sheath cells develop. The mutant defects are unified by  
29 compromised mesophyll cell development. In addition to Kranz defects, *Zmscr1;Zmscr1h* mutants  
30 fail to form an organized endodermal layer in the root. Collectively, these data indicate that ZmSCR1  
31 and ZmSCR1h redundantly regulate cell-type patterning in both leaves and roots of maize. Leaf and  
32 root pathways are distinguished, however, by the cell layer in which they operate – mesophyll at a  
33 two-cell distance from leaf veins versus endodermis immediately adjacent to root vasculature.

## 34 INTRODUCTION

35 The C<sub>4</sub> photosynthetic pathway, which is responsible for around 21% of global primary productivity  
36 despite being found in only ~3% of plant species (Ehleringer et al., 1997; Sage et al., 2011), is  
37 underpinned by a specialized leaf anatomy known as Kranz (the German word for wreath) (reviewed  
38 in Sedelnikova et al., 2018). Unlike in C<sub>3</sub> plants, where photosynthesis only occurs in the mesophyll  
39 cells, the C<sub>4</sub> pathway is separated between bundle sheath (BS) and mesophyll (M) cells, with the  
40 two cell-types forming concentric wreaths around leaf veins (reviewed in Langdale, 2011). Efficient  
41 operation of the C<sub>4</sub> cycle relies on an increased BS to M cell ratio relative to that seen in C<sub>3</sub> plants,  
42 an increase that is achieved by altering vein density so that vascular bundles are often separated by  
43 only two mesophyll cells in a recurring vein-BS-M-M-BS-vein pattern across the leaf. In C<sub>4</sub> monocots  
44 such as maize, this high vein density results from the formation of small 'rank-2' intermediate veins  
45 in between the lateral and rank-1 intermediate veins that are common to both C<sub>3</sub> and C<sub>4</sub> species  
46 (Esau, 1943; Russell and Evert, 1985; Sharman, 1942). Given the higher yields found in many C<sub>4</sub>  
47 plants, there are ongoing attempts to engineer the C<sub>4</sub> pathway into C<sub>3</sub> crops (Hibberd et al., 2008;  
48 von Caemmerer et al., 2012; Wang et al., 2016), however, such attempts require a far better  
49 understanding of how vein spacing and leaf cell fate is regulated in C<sub>4</sub> species.

50

51 Our understanding of the genetic components that regulate the development of Kranz anatomy is  
52 extremely limited, in part because traditional approaches to gene-discovery, such as mutant screens,  
53 failed to reveal any regulators of vein spacing or BS/M cell fate (Langdale, 2011). More recent  
54 transcriptomic analyses identified candidate genes that are expressed in a manner consistent with  
55 roles in Kranz patterning (Fouracre et al., 2014; Wang et al., 2013), but in most cases gene function  
56 has yet to be validated. One candidate, the maize GRAS protein SCARECROW1 (ZmSCR1), has  
57 been shown to regulate aspects of Kranz patterning in that *Zmscr1* mutants have subtle alterations  
58 in vascular, BS and M development (Slewinski et al., 2012). In *Arabidopsis thaliana* (hereafter  
59 referred to as *Arabidopsis*) the *ZmSCR1* ortholog radially patterns cell-types in the root (Di Laurenzio  
60 et al., 1996; Wysocka-Diller et al., 2000); AtSCR prevents movement of AtSHORTROOT (AtSHR)  
61 beyond the cell-layer adjacent to the vasculature, which ensures specification of endodermal cells  
62 in that layer (Cui et al., 2007). However, an organized endodermal cell layer is present in *Zmscr1*  
63 mutants (Slewinski et al., 2012), suggesting that gene function may have diverged between maize  
64 and *Arabidopsis*. Given that the root endodermis and the leaf BS are considered analogous cell  
65 types (Esau, 1943; Nelson, 2011), it is possible that an ancestral SCR patterning function was  
66 recruited in the leaf rather than the root in maize, but the subtle phenotype reported in leaves of  
67 *Zmscr1* mutants precludes an understanding of the precise role played during Kranz development.

68

69 Both gene and whole genome duplication events are highly prevalent throughout the plant phylogeny  
70 (Adams and Wendel, 2005; Blanc and Wolfe, 2004) and if retained in the genome, duplicated genes  
71 are free to sub- or neo-functionalize (Moore and Purugganan, 2005; Ohno, 1970). Perhaps more

72 commonly, however, gene duplicates function redundantly. Indeed, there are many examples  
73 illustrating the importance of genetic redundancy in plants, and without understanding phylogenetic  
74 context, loss-of-function data can be difficult to interpret (Strable et al., 2017; Yi et al., 2015). This is  
75 particularly important in maize, which in addition to undergoing three ancient whole genome  
76 duplication events common to monocots, has also undergone a more recent event not shared with  
77 its close relative *Sorghum bicolor* (Messing et al., 2004; Schnable et al., 2009; Swigonova et al.,  
78 2004). It is thus likely that *ZmSCR1* acts redundantly with a duplicate gene to pattern cell-types in  
79 maize.

80

81 To better understand the role of *ZmSCR1* in maize development we first constructed a phylogeny of  
82 *SCR*-related genes, which revealed that *ZmSCR1* has a previously overlooked homeolog duplicate  
83 *ZmSCR1h*. When transposon-induced loss of function alleles of both genes were combined, double  
84 mutants exhibited leaf and root phenotypes that were not seen in segregating single mutant siblings.  
85 Cell-type specification was perturbed in both the leaf and root of *Zmscr1; Zmscr1h* double mutants,  
86 with endodermal defects observed in the root. Intriguingly, however, M rather than BS cell  
87 development was primarily perturbed in the leaf. We present a quantitative analysis of single and  
88 double *Zmscr1; Zmscr1h* mutant leaf phenotypes, plus expression data for both genes in developing  
89 wild-type maize leaf primordia. The results are discussed in the context of how *SCR* function has  
90 diversified in flowering plants.

## 91 RESULTS

### 92 **SCR is duplicated in maize**

93 To determine phylogenetic relationships between *SCR*-related genes in land plants, a maximum  
94 likelihood phylogeny was constructed. Figure 1A shows that two clades of *SCR* genes are present  
95 in both eudicots and monocots, with the underlying duplication event inferred after the divergence of  
96 *Physcomitrella patens* and vascular plants. In Arabidopsis, the *SCR* clade contains a single gene  
97 (*AtSCR*), with the closest related homolog (*SCR-LIKE 23 - AtSCL23*) in the sister clade. Apart from  
98 *Ananas comosus*, the sampled monocot genomes contain single-copy orthologs of *AtSCL23*. In  
99 contrast, *SCR* has independently duplicated in at least four monocot genomes (maize, *Sorghum*  
100 *bicolor*, *Setaria italica* and *Oryza sativa*), and the apparent single copy in *Setaria viridis* is likely an  
101 annotation error. The maize *SCR* duplicates reside on syntenic regions of chromosomes 4  
102 (*ZmSCR1*) and 2 (*ZmSCR1h*), and have previously been annotated as likely homeolog gene pairs  
103 that arose through the recent maize whole genome duplication (Schnable et al., 2011). Sequence  
104 comparisons reveal 85% amino acid identity between *ZmSCR1* and *ZmSCR1h* and both contain an  
105 N-terminal domain that prevents intercellular movement of the *AtSCR* protein (Gallagher and Benfey,  
106 2009). These observations suggest that *ZmSCR1* and *ZmSCR1h* act redundantly, and in a cell-  
107 autonomous manner.

108

## 109 **Transposon insertion alleles of *ZmSCR1* and *ZmSCR1h* cause loss of function**

110 To test the hypothesis of functional redundancy, we first identified transposon insertion alleles for  
111 each gene. Two *Zmscr1* alleles (*-m1* and *-m2*) have been reported previously (Slewinski et al.,  
112 2012), and we identified two independent *Zmscr1h* alleles (*Zmscr1h-m1* and *-m2*) in the UniformMu  
113 transposon insertion collection (Fig. S1A) (McCarty et al., 2005). In both *Zmscr1h-m1* and *-m2*, a  
114 *Mutator* (*Mu*) element was predicted to be inserted in the second exon of the *ZmSCR1h* coding  
115 sequence (Fig. 1B). Seed stocks for both alleles, plus *Zmscr1-m2* which is in the same UniformMu  
116 W22 background, were obtained from the Maize Genetics Stock Centre  
117 (<http://maizecoop.cropsci.uiuc.edu/>). Single *Mu* insertions in the genes of interest are documented  
118 for the *Zmscr1-m2* and *Zmscr1h-m1* lines, whereas the *Zmscr1h-m2* line contains four additional *Mu*  
119 elements inserted at other loci (Fig. S1A). Insertion positions were confirmed by polymerase chain  
120 reaction (PCR) amplification of genomic DNA, using primers in the transposon and in the adjacent  
121 genic region (Fig. S1B, C). In all cases, the size of the amplified product was consistent with the  
122 predicted insertion site. Primers flanking the *Mu* element enabled homozygous mutant individuals to  
123 be identified.

124

125 To confirm that the transposon insertion alleles compromised gene function, transcripts were  
126 amplified and sequenced, using RNA extracted from homozygous mutant leaf primordia as a starting  
127 template. Reverse transcriptase (RT)-PCR revealed that in all cases, the *Mu* element was present  
128 in the *ZmSCR1* or *ZmSCR1h* transcript, at the position predicted by the insertion site (Fig. S1D). As  
129 such, even if transcripts were translated, a non-functional protein would be produced.

130

## 131 **Loss of function *ZmSCR1h* mutants do not exhibit cell-type patterning defects**

132 To determine whether *Zmscr1h* mutants display similar defects in Kranz patterning to those reported  
133 in *Zmscr1* mutants (Slewinski et al., 2012), leaf traits were compared between *Zmscr1-m2*, *Zmscr1h-*  
134 *m1* and *Zmscr1h-m2* single mutants, and corresponding wild-type siblings segregating in each line.  
135 Figure 2 shows that there was no qualitative difference between wild-type and either *Zmscr1* or  
136 *Zmscr1h* single mutants in overall plant growth (Fig. 2A-D), or in general Kranz patterning (Fig. 2E-  
137 H). Quantification of the number of M cells between veins (Fig. 2I), vein density across the leaf (Fig.  
138 2J), and the ratio of rank-1:rank-2 intermediate veins (Fig. 2J), failed to confirm previous reports of  
139 altered vein density and interveinal M cell number in *Zmscr1-m2* mutants, but showed that *Zmscr1-*  
140 *m2* mutants exhibit a small but significant increase in the ratio of rank-1:rank-2 intermediate veins  
141 (Fig. 2J). No significant difference was observed between wild-type and either *Zmscr1h* mutant allele  
142 for any of the measured traits. Previous reports of supernumerary BS cells in *Zmscr1-m2* mutants  
143 (Slewinski et al., 2012) were confirmed, and the trait was also seen in *Zmscr1h-m1* and *Zmscr1h-*  
144 *m2* single mutants (Fig. 2K). However, very few instances were observed above background levels  
145 in segregating wild-type siblings and over 97% of veins in mutant leaves were surrounded by a

146 normal BS cell layer (Fig. 2K). As such, it can be concluded that mutations in *ZmSCR1* or *ZmSCR1h*  
147 cause only minor perturbations to Kranz patterning mechanisms.

148

149 In the absence of any major defects in *Zmscr1h* mutant leaves, and given that root development is  
150 perturbed in Arabidopsis mutants, we also examined cell-type patterning in single mutant roots. In  
151 *Atscr* mutants, instead of distinct layers of endodermis and cortex differentiating around the  
152 vasculature, a single cell layer with characteristics of both cell-types forms (Di Laurenzio et al., 1996).  
153 Notably, qualitative histological analysis of *Zmscr1-m2*, *Zmscr1h-m1* and *Zmscrh1-m2* root sections  
154 revealed normal development, with a clear endodermal boundary between the vasculature and the  
155 multiple cortical layers that are characteristic in maize (Fig. 2L-O). This observation suggests either  
156 that *ZmSCR1* and *ZmSCR1h* act redundantly to form an endodermal layer in the maize root, or that  
157 the role of the SCR pathway in patterning endodermis has diverged between Arabidopsis and maize.

158

### 159 ***Zmscr1;Zmscr1h* double mutants exhibit stunted growth**

160 To distinguish hypotheses of redundant versus divergent function of *ZmSCR1* and *ZmSCR1h*,  
161 double mutant lines were generated with *Zmscr1-m2* and the two independent *Zmscr1h* alleles. In  
162 F2 populations, 6/107 and 5/78 individuals were genotyped as *Zmscr1-m2;Zmscr1h-m1* and  
163 *Zmscr1-m2;Zmscr1h-m2* respectively, which matched the expected segregation ratio ( $\chi^2$   $p > 0.05$  in  
164 both cases). Although *Zmscr1;Zmscr1h* double mutants sometimes formed tassels when grown in  
165 the greenhouse, they rarely produced ears, and plants were never successfully self-pollinated. As  
166 such, phenotypic analysis was initially carried out using F2 populations segregating 1 in 16 for the  
167 homozygous double mutants. More detailed characterization was undertaken with F3 progeny of  
168 self-pollinated F2 *Zmscr1-m2/+;Zmscr1h-m1* plants, which segregated 1 in 4 for the *Zmscr1-*  
169 *m2;Zmscr1h-m1* homozygous double mutants. In all experiments, comparisons were made to wild-  
170 type plants segregating in the same population.

171

172 Unlike segregating single mutants, double mutants exhibited slower growth and reduced plant size  
173 (Fig. 3), similar to that reported for *Atscr* mutants (Di Laurenzio et al., 1996). Furthermore, *Zmscr1-*  
174 *m2;Zmscr1h-m1* and *Zmscr1-m2;Zmscr1h-m2* mutant leaves were on average 46% and 74% the  
175 length of corresponding wild-type leaves respectively, with leaf width also proportionally reduced  
176 (Fig. S2A, B). Despite the plants being smaller, they were not markedly developmentally delayed,  
177 because the emergent leaf in *Zmscr1-m2;Zmscr1h-m1* double mutants was only around one  
178 plastochron (the time interval between initiation of leaves at the shoot apex) behind that of wild-type  
179 after 31 days of growth (Fig. S2D). Strikingly, however, emerging leaves in both double mutants  
180 were droopy (Fig. 3C, D). This phenotype was associated with a reduction in midrib length such that  
181 it extended on average 41% (*Zmscr1-m2;Zmscr1h-m1*) and 61% (*Zmscr1-m2;Zmscr1h-m2*) of the  
182 total leaf length compared to 75% and 83% in leaves of wild-type siblings (Fig. S2C). Defective  
183 growth was more severe in field-grown plants, suggesting an environmental influence.

184

185 **ZmSCR1 and ZmSCR1h redundantly regulate formation of the endodermis in maize roots**

186 Given the environmental influence on the stunted growth phenotype of *Zmscr1;Zmscr1h* double  
187 mutants, and the well-characterized phenotype of *Atscr* mutants, we hypothesized that loss of  
188 *ZmSCR1* and *ZmSCR1h* function disrupted differentiation of the root endodermis. Transverse  
189 sections from the maturation zone of *Zmscr1-m2;Zmscr1h-m1* primary roots were therefore  
190 examined. Figure 4 shows that overall size and structure of the root is normal, with apparently typical  
191 differentiation of cortex cells (Fig. 4A, B). However, there is no clear boundary between the  
192 vasculature and cortex (Fig. 4E). This pattern was also apparent in the seminal roots of *Zmscr1-*  
193 *m2;Zmscr1h-m2* mutants (Fig. 4C, F). These results demonstrate that ZmSCR1 and ZmSCR1h  
194 redundantly regulate formation of an organized endodermal layer in maize roots, possibly in an  
195 analogous manner to AtSCR in Arabidopsis.

196

197 **Bundle sheath cell specification is not perturbed in *Zmscr1;Zmscr1h* mutant leaves**

198 The original thesis that the SCR pathway may regulate Kranz patterning in the maize leaf was  
199 predicated on the long held view that the root endodermis and leaf BS are analogous cell-types, and  
200 that radial patterning mechanisms may be conserved in root and leaf (Slewinski, 2013). Given the  
201 clear absence of an organized endodermal layer in *Zmscr1;Zmscr1h* double mutants (Fig. 4), if leaf  
202 and root pathways are conserved, BS cell formation should be severely perturbed in leaves. To test  
203 whether this is the case, the position and number of BS cells was quantified across double mutant  
204 leaves (Fig. 5A-C). Crucially, all veins had a normal BS cell layer (Fig. 5A, B) and as such, whereas  
205 the SCR pathway is necessary for the formation of an endodermal layer in the root, it is not required  
206 for the development of a BS cell layer around leaf veins.

207

208 Although double mutants did not produce deficiencies in the layer of BS cells around each vein,  
209 instances of supernumerary BS-like cells outside of the normal layer were observed (Fig. 5A, B).  
210 Quantification of this phenotype revealed significantly higher frequencies in both *Zmscr1;Zmscr1h*  
211 double mutants than in single mutants (Fig. 5C, Fig. 2K). However, even in the double mutants, over  
212 90% of leaf veins had normal BS cell layers. To resolve whether the supernumerary BS-like cells  
213 were functionally equivalent to true BS cells, immunolocalization using an antibody against NADP-  
214 malic enzyme (NADP-ME) was carried out with wild-type and double mutant leaves. NADP-ME  
215 accumulated specifically in BS chloroplasts of wild-type maize leaves (Fig. 5D, E) and was detected  
216 in all of the supernumerary BS-like cells in double mutant leaves (Fig. 5F, G). Given the BS identity,  
217 cell position, and low frequency occurrence of these supernumerary cells, it is most likely that they  
218 are formed by late divisions of cells that are already differentiated as BS in the layer around the vein.

219

220 ***ZmSCR1* and *ZmSCR1h* transcripts accumulate in ground meristem cells of leaf primordia**

221 As the protein sequences of both *ZmSCR1* and *ZmSCR1h* predict cell-autonomous function, we  
222 sought to determine where the genes might act by determining spatial and temporal patterns of  
223 transcript accumulation during early leaf development. To this end, *in situ* hybridization was  
224 undertaken with developing wild-type leaf primordia. Fragments in the first exon (*ZmSCR1*) or the  
225 3'UTR (*ZmSCR1h*), that were predicted to be gene-specific (Fig. S3), were used to distinguish  
226 *ZmSCR1* and *ZmSCR1h*. In plastochron (P)4 and P5 leaf primordia, transcripts of both genes were  
227 detected in the layer of ground meristem cells that surrounds developing veins, but were not detected  
228 in dividing procambial centres or in procambial-derived BS precursor cells (Fig. 6A-H). Notably, high  
229 transcript levels were observed in the single M precursor cells that are present between developing  
230 veins at P4 (Fig. 6B, C, E-H). These cells divide to form the two M cells present in the recurring vein-  
231 BS-M-M-BS-vein units that characterise Kranz anatomy in maize. Transcripts could not be detected  
232 in the regions of primordia where 2 interveinal cells were already present (Fig. 6G, H). The observed  
233 patterns of gene expression led us to hypothesise that *ZmSCR1* and *ZmSCR1h* pattern the cell layer  
234 encircling the BS during the development of Kranz anatomy.

235

236 **Impaired mesophyll cell divisions are associated with higher vein density in *Zmscr1;Zmscr1h***  
237 **mutant leaves**

238 Consistent with transcript accumulation in M precursor cells between developing veins of WT P4 leaf  
239 primordia, there was a marked increase in the number of veins separated by just a single M cell in  
240 mature fully expanded leaves of *Zmscr1;Zmscr1h* mutants (Fig. 6I-L). In segregating wild-type  
241 backgrounds (and in single mutants – Fig. 2I), around 90% of all veins were separated by two M  
242 cells; whereas in both *Zmscr1-m2;Zmscr1h-m1* and *Zmscr1-m2;Zmscr1h-m2* mutants, most veins  
243 were separated by one M cell (68% and 52% of veins surveyed respectively) (Fig. 6L). Veins with  
244 no M cells in between were observed at 5-10% frequency in double mutants. This low frequency  
245 phenotype could result from the failure to specify a M precursor cell (and any subsequent divisions)  
246 or from ectopic BS cell divisions displacing M cells, either of which would effectively lead to vein  
247 anastomoses. The more penetrant phenotype suggests that *ZmSCR1* and *ZmSCR1h* act  
248 redundantly to promote the cell division that generates two M cells in the characteristic vein-BS-M-  
249 M-BS-vein unit of Kranz.

250

251 To determine whether the decrease in M cell number between veins resulted in higher vein density  
252 across the leaf, or whether a compensatory reduction in vein number was manifest, vein number  
253 and leaf width were quantified in wild-type and double mutant leaves. Figure 6M shows that total  
254 vein density is significantly increased in *Zmscr1;Zmscr1h* double mutants. As well as reflecting fewer  
255 M cell divisions, this phenotype could also reflect the reduced width of *Zmscr1;Zmscr1h* mutant  
256 leaves (Fig. S2B), as both leaf width and cell size influence vein density in monocots. Either way,



257 the increased vein density in *Zmscr1;Zmscr1h* mutants does not reflect an increase in the total  
258 number of veins formed across the width of the leaf (Fig. S2E), and as such a direct role for ZmSCR1  
259 and ZmSCR1h in the initiation and development of leaf veins can be eliminated.

260

261 **The relative proportions of intermediate vein ranks is altered in *Zmscr1;Zmscr1h* mutants**

262 Although a role for *ZmSCR1* and *ZmSCR1h* in regulating the number of leaf veins was discarded,  
263 quantification of vein numbers and ranks in *Zmscr1;Zmscr1h* mutants revealed a striking shift in the  
264 proportion of each vein type that developed. *Zmscr1;Zmscr1h* mutants formed lignified  
265 sclerenchyma ad- and abaxially to the vein at far greater frequency than in wild-type (Fig. 7). In both  
266 C<sub>3</sub> and C<sub>4</sub> monocots, sclerenchyma is associated with both lateral and rank-1 intermediate veins.  
267 Rank-2 intermediate veins that do not form lignified sclerenchyma only form in C<sub>4</sub> leaves with Kranz  
268 anatomy. In a typical wild-type maize leaf, two lateral veins are separated by between one and three  
269 evenly spaced rank-1 intermediate veins. These are in turn separated by multiple rank-2  
270 intermediate veins, leading to a ratio of rank-1 to rank-2 veins of less than 0.2 (indicating on average  
271 >5 rank-2 veins to every rank-1 vein) (Fig. 7A, C, E). In contrast, a striking and consistent ratio of  
272 around 0.5 (indicating only two rank-2 veins to every rank-1 vein) is observed in *Zmscr1;Zmscr1h*  
273 double mutants (Fig. 7B, D, E), a ratio that is much greater than that seen in single *Zmscr1-m2*  
274 mutants (Fig. 2J). Notably, the extra rank-1 intermediates are not evenly spaced as in wild-type, but  
275 instead can be immediately adjacent to other rank-1 intermediate veins (Fig. 7D), and sclerenchyma  
276 is preferentially positioned on the abaxial side of the vein. Given that *ZmSCR1* and *ZmSCR1h*  
277 transcripts accumulate in ground meristem cells both ab- and adaxially to developing veins (Fig. 6  
278 A-H), the observed shift in vein ranks in double mutants might suggest that in wild-type leaves  
279 ZmSCR1/ZmSCR1h promote cell divisions and/or specification of M cells in these regions, and in so  
280 doing suppress sclerenchyma formation.

## 281 **DISCUSSION**

282 Pattern formation is a fundamental process in both plant and animal development. In plants, radial  
283 patterning around the vasculature is of particular importance, and in the root is regulated by the  
284 SHR/SCR pathway (Cui et al., 2007). Here, we have shown that maize encodes two *SCR* genes  
285 which are equally orthologous to *AtSCR* (Fig. 1), and that *Zmscr1;Zmscr1h* double mutants exhibit  
286 a perturbed growth phenotype (Fig. 3) which closely resembles that seen in *Atscr* mutants (Di  
287 Laurenzio et al., 1996). The roots of *Zmscr1;Zmscr1h* plants lack an organized endodermal cell layer  
288 (Fig. 4), consistent with the reported localization of *ZmSCR1* transcripts in the developing  
289 endodermis (Lim et al., 2005). However, this phenotype is somewhat distinct from *Atscr* mutants in  
290 which a single organized ground-tissue layer with features of both the endodermis and cortex  
291 surrounds the vasculature (Di Laurenzio et al., 1996). In leaves, *ZmSCR1* and *ZmSCR1h* transcripts  
292 accumulate preferentially in ground meristem cells that will divide and differentiate into M cells (Fig.  
293 6A-H), and fewer M cells are found in mature leaves of *Zmscr1;Zmscr1h* mutants than in wild-type  
294 (Fig. 6I-L). All of the phenotypic perturbations observed in double mutants are either absent or  
295 significantly less frequent in single mutants (Fig. 2), indicating that *ZmSCR1* and *ZmSCR1h* function  
296 redundantly. Collectively, these results demonstrate that the SCR radial patterning mechanism  
297 operates in both roots and leaves of maize.

298  
299 The canonical SHR/SCR pathway, in which *AtSCR* prevents *AtSHR* movement more than one cell-  
300 layer away from the root vasculature, was characterized in the context of roots with a single layer of  
301 both endodermis and cortex (Cui et al., 2007). However, maize and other monocots form multiple  
302 cortex layers (Clark and Harris, 1981; Dolan et al., 1993; Hochholdinger et al., 2018; Wu et al., 2014).  
303 It has been proposed that the number of cortex cell-layers in monocots is regulated by the extent to  
304 which SHR moves away from the root vasculature (Henry et al., 2017; Wu et al., 2014). Although  
305 SHR movement has not been confirmed in maize, there is no obvious change in the number of cortex  
306 cell-layers formed in *Zmscr1;Zmscr1h* mutants, despite the endodermal layer being absent (Fig. 3).  
307 This can be explained in one of three ways; 1) SHR is not involved in regulating cortical cell-layers  
308 in maize; 2) SCR does not restrict SHR movement in maize roots, a suggestion supported by the  
309 finding that movement of monocot SHR proteins was not constrained in planta by interaction with  
310 *AtSCR* (Wu et al., 2014); or 3) SHR is necessary but not sufficient to induce the formation of extra  
311 cell-layers, consistent with the finding that *Atscr* mutants form only one ground-tissue layer despite  
312 SHR movement being unconstrained (Di Laurenzio et al., 1996). Crucially, all of these alternatives  
313 indicate that the canonical SHR/SCR pathway is modified in roots that develop multiple layers of  
314 cortex.

315  
316 The root endodermis and leaf BS are considered analogous (Esau, 1943; Nelson, 2011), and as  
317 such it has been suggested that the differentiation of both cell-types is regulated by the same genetic  
318 mechanism (Slewinski, 2013). However, in *Zmscr1;Zmscr1h* mutants an organized root endodermis

319 is absent, whereas all leaf veins have a ring of surrounding BS cells (Fig. 5). In some cases,  
320 supernumerary BS cells that resemble those seen in the maize *tangled1* mutant (Jankovsky et al.,  
321 2001), are also observed around leaf veins (Fig. 5). In the *tangled1* mutant these supernumerary  
322 cells result from abnormal late divisions caused by perturbations in cell-division planes throughout  
323 the leaf (Jankovsky et al., 2001), suggesting that similar compensatory cell divisions may occur in  
324 *Zmscr1;Zmscr1h* mutants in response to aberrant divisions of ground meristem cells. Although a role  
325 for ZmSCR1 and ZmSCR1h in specifying BS cell fate remains formally possible, given that there is  
326 no evidence of preferential BS expression either early in leaf development (Fig. 6A-H) or in mature  
327 leaves (Chang et al., 2012; Denton et al., 2017; Li et al., 2010; Tausta et al., 2014) and that amino  
328 acid sequences predict both proteins are immobile (Gallagher and Benfey, 2009), a role in M  
329 patterning is more likely. Perturbations in *Zmscr1;Zmscr1h* leaves validate this suggestion in that  
330 most veins are separated by only one M cell, indicating impaired division of the single M-precursor  
331 cell that is marked by high *ZmSCR1* and *ZmSCR1h* transcript accumulation (Fig. 6). In addition,  
332 sclerenchyma forms ab- and adaxially to veins where M cells would normally develop (Fig. 7),  
333 suggesting that ZmSCR1 and ZmSCR1h inhibit the longitudinal divisions that give rise to  
334 sclerenchyma (Bosabalidis et al., 1994; Esau, 1943) and/or promote M cell differentiation. Taken  
335 together, these results refute the hypothesis that the endodermis and BS are patterned by the same  
336 mechanism, and instead suggest that SCR functions to promote the development of endodermal  
337 cells in the root and M cells in the leaf.

338

339

340 The most consistent mutant phenotype in *Zmscr1;Zmscr1h* leaves is the increased number of veins  
341 separated by only one M cell, which accounts for 68% (*Zmscr1-m2;Zmscr1h-m1*) or 52% (*Zmscr1-*  
342 *m2;Zmscr1h-m2*) of veins in double mutants compared to <10% in WT (Fig. 6L). However,  
343 penetrance is clearly not complete as 23% and 36% of veins are still separated by two M cells (Fig.  
344 6L). Notably, this contrasts with complete penetrance of the endodermal defects in *Zmscr1;Zmscr1h*  
345 mutant roots (Fig. 3). We hypothesize that this difference reflects single versus multiple clonal origins  
346 of endodermal and M cells. At least in Arabidopsis, all endodermal cells arise from divisions of initials  
347 that are distinct from those that form the vasculature (Dolan et al., 1993). By contrast, although the  
348 central ground meristem layer gives rise to all leaf veins and BS cells plus M cells in that layer  
349 (Langdale et al., 1989), once procambium has been specified two origins of central M cells can be  
350 distinguished (Jankovsky et al., 2001). Lineage analyses found that 67% of sectors induced after  
351 procambium initiation comprised a complete ring of BS cells but no M cells, whereas 33% of sectors  
352 consisted of a few cells in the BS layer plus one or more adjacent M cells (Jankovsky et al., 2001).  
353 As such, two thirds of M cells in the central leaf layer originate from ground tissue that is clonally  
354 distinct from the BS whereas one third are clonally related to adjacent BS cells. These proportions  
355 are consistent with the percentages of veins separated by one (~60%) versus two (~40%) M cells in  
356 *Zmscr1;Zmscr1h* mutants, and thus suggest that the division and differentiation of M cells originating

357 from the same precursor cell as the vascular bundle is regulated by a SCR-independent mechanism.  
358 This implies that the transition from ground meristem to M cell is regulated by at least two distinct  
359 mechanisms within the maize leaf.

360

361 It has been hypothesized that SHR/SCR mediated patterning of cell-types in the leaf is specific to  
362 C<sub>4</sub> Kranz anatomy (Slewinski, 2013). Current evidence is supportive of Kranz-specific SHR/SCR  
363 roles in that *Atscr* mutant leaves exhibit only a slight enlargement of BS cell size (Cui et al., 2014)  
364 and constitutive expression of *ZmSCR1* in rice failed to disrupt any aspect of leaf development  
365 (Wang et al., 2017). These observations suggests that SCR is neither necessary nor sufficient to  
366 regulate the spatial arrangement of cell-types in the inner leaf layers of C<sub>3</sub> plants. Transcripts of one  
367 of the two rice *SCR* orthologs localize to cells that give rise to stomata (Kamiya et al., 2003) and  
368 constitutive expression of *ZmSHR2* in rice induces changes in stomatal rather than BS or M cell  
369 patterning (Schuler et al., 2018), suggesting that the SHR/SCR pathway may regulate cell-type  
370 specification in the epidermis rather than the inner leaf layers of rice. However, this suggestion needs  
371 further investigation given that our data reveal a role for SCR in M cell development and that M cells  
372 are a common feature of both C<sub>3</sub> and C<sub>4</sub> leaves. Based on current evidence we conclude that the  
373 SHR/SCR pathway represents a flexible regulatory module that has been co-opted to pattern cell-  
374 types in a range of developmental contexts in both roots and shoots of flowering plants.

## 375 MATERIALS AND METHODS

### 376 Plant stocks and growth conditions

377 UniformMu seed stocks harbouring *Mutator* insertions in either *ZmSCR1* (GRMZM2G131516) or  
378 *ZmSCR1h* (GRMZM2G015080) were acquired from the maize genetics COOP stock centre  
379 (<http://maizecoop.cropsci.uiuc.edu>) (Fig. S1A). Plants were grown in the field at Iowa State  
380 University, and individuals harbouring the *Zmscr1-m2* allele were outcrossed to those harbouring  
381 either the *Zmscr1h-m1* or *-m2* allele. F1 plants heterozygous for both insertions were self-pollinated  
382 to yield F2 populations segregating 1/16 for both segregating wild-type and *Zmscr1;Zmscr1h* double  
383 mutants. Self-pollinations of *Zmscr1-m2/+;Zmscr1h-m1* F2 plants resulted in F3 families where  
384 *Zmscr1-m2;Zmscr1h-m1* homozygous double mutants segregated 1/4. The inbred line B73 was  
385 used for *in situ* hybridization experiments.

386

387 For developmental analyses, plants were grown in a greenhouse in Oxford with a 16hr/8hr light  
388 regime. Daytime temperature was maintained at 28°C and night-time temperature at 20°C.  
389 Supplemental light was provided when natural light was lower than 120µmol photon m<sup>-2</sup> s<sup>-1</sup>. Seed  
390 were germinated in warm, damp vermiculite and transferred after one week to 12cm diameter pots  
391 containing a 3:1 mix of John Innes No.3 Compost (J. Arthur Bower) and medium vermiculite (Sinclair  
392 Pro).

393

### 394 Genotyping

395 A first round of genotyping was undertaken on genomic DNA extracted with a sodium dodecyl sulfate  
396 (SDS) high throughput 96-well plate protocol. Leaf tissue was homogenized with 500µl SDS  
397 extraction buffer (200mM Tris pH 7.5, 250mM NaCl, 25mM EDTA, 0.5% SDS) in 96-well collection  
398 microtubes. Plates were then centrifuged at 6000rpm for 10 min, and 200µl supernatant removed  
399 and mixed with 200µl isopropanol in a 96 well polypropylene plate. After 10 min incubation at room  
400 temperature, plates were centrifuged and the supernatant discarded. DNA pellets were washed in  
401 70% (v/v) ethanol, centrifuged and air dried before being resuspended in 100µl dH<sub>2</sub>O.

402

403 Individuals identified with genotypes of interest were subjected to a second round of genotyping  
404 using genomic DNA extracted using a modified cetyl-trimethyl-ammonium bromide (CTAB) protocol  
405 optimized to yield high-quality DNA (Murray and Thompson, 1980). Leaf tissue was homogenized at  
406 room temperature in CTAB buffer (1.5% (w/v) CTAB, 75mM Tris-HCl pH 8, 15mM EDTA pH 8, 1.05M  
407 NaCl) and heated to 65°C for 30 min. An equal volume of 24:1 chloroform: isoamyl alcohol was  
408 added and mixed, before samples were centrifuged. The resultant supernatant was mixed with 2.5  
409 volumes of 100% (v/v) ethanol. The precipitate was collected by centrifugation and washed with 70%  
410 (v/v) ethanol before drying and resuspending in 100µl dH<sub>2</sub>O.

411

412 The presence of mutant alleles and the sites of insertion were elucidated by PCR using a 1:1 mix of  
413 two primers (EOMu1 and EOMu2, Fig. S2B, C) designed to amplify out from both the 5' and 3' end  
414 of the *Mutator* element, and a primer amplifying from the gene sequence adjacent to the predicted  
415 insertion site (Fig. S2B, C). The presence of the wild-type allele was confirmed using a pair of primers  
416 that flanked the insertion site (Fig. S2B, C). In some cases, the 'wild-type' primers amplified across  
417 the transposon producing a larger product size from mutant alleles than from wild-type alleles.  
418 However, in most cases there was no amplification with these primers when only the mutant alleles  
419 were present. PCR amplifications were carried out in a total reaction volume of 10 $\mu$ L containing 5  
420  $\mu$ L of 2xGoTaq master mix (Promega) and 2.5  $\mu$ L of 4M betaine. Reaction conditions were as follows:  
421 95°C for 5 min; 35 cycles of 95°C for 30 s, 57-64°C for 30 s, and 72°C for 1:00-1:30 min; and 72°C  
422 for 10 min. All PCR experiments were designed and tested using homozygous single mutant lines  
423 to ensure that primers only amplified from the correct gene sequence. All PCR products were  
424 assessed by agarose gel electrophoresis.

425

426 To determine whether transposons were retained in the transcripts from mutant alleles, RNA was  
427 extracted using an RNeasy Plant Mini Kit following the manufacturer's instructions (Qiagen).  
428 Extracted RNA was DNaseI treated using TURBO DNase (Invitrogen) and 2 $\mu$ g RNA was used for  
429 cDNA synthesis using a Maxima First Strand cDNA synthesis kit (Thermo Scientific). RT-PCR was  
430 carried out on 1/10 cDNA dilutions using primers amplifying from the transposon to the flanking  
431 genomic region (Fig. S2).

432

### 433 **Analysis of fresh leaf sections**

434 Plants were photographed 32 days after planting, and fully expanded leaf 5 (i.e. the fifth leaf to  
435 emerge after germination) was removed at the ligule for phenotypic analysis. Leaf length, width and  
436 midrib extension (the point along the proximal/distal axis at which the midrib was no longer visible)  
437 were recorded. Segments of leaf encompassing the midrib and the 3-4 adjacent lateral veins were  
438 cut from the midpoint along the proximal/distal axis and positioned upright in 7% agar. Once cooled,  
439 blocks were trimmed and mounted such that veins were vertically orientated. 50-60 $\mu$ m sections were  
440 cut using a vibratome and then cleared for around 10 min in 3:1 ethanol: acetic acid. Sections were  
441 incubated in 70% ethanol overnight, then floated on slides with 70% ethanol (v/v) and covered with  
442 a coverslip. Leaf sections were imaged using a Leica DMRB microscope with QImaging  
443 MicroPublisher camera (QImaging, [www.qimaging.com](http://www.qimaging.com)) and Image-Pro Insight software  
444 (MediaCybernetics, [www.mediacy.com](http://www.mediacy.com)). Images were taken using brightfield (which enabled BS and  
445 M cells to be identified) and UV (which enabled sclerenchyma and thus vein orders to be determined)  
446 illumination. Images were tiled together so that the region of leaf between two lateral veins was  
447 represented. Subsequent quantification of segment width was undertaken using the ImageJ software  
448 package ([www.imagej.nih.gov](http://www.imagej.nih.gov)).

449

## 450 **Tissue fixation and embedding**

451 Segments of primary and seminal roots were fixed in ice-cold 90% acetone for 15 min, rinsed with  
452 100mM phosphate buffer (pH 7), placed in 3:1 ethanol: acetic acid for a further 15 min and then  
453 transferred to 70% (v/v) ethanol. B73 shoot apices were harvested on ice after 7 days growth, prior  
454 to the emergence of the first leaf through the coleoptile. Harvested apices were fixed and vacuum  
455 infiltrated for 1 min in ice-cold 4% (w/v) paraformaldehyde. Fresh paraformaldehyde was added  
456 following vacuum infiltration and samples left overnight. The following day, samples were dehydrated  
457 through ice cold 10%, 30%, 50% and 70% (all v/v) ethanol for 2 hours each. Segments of leaf were  
458 cut from the midpoint along the proximal/distal axis of fully expanded leaf 5, encompassing ~3 lateral  
459 veins adjacent to the midvein. Leaf segments were fixed for 30 min in 3:1 ethanol: acetic acid and  
460 transferred to 70% EtOH. All fixed tissue was stored at 4°C in 70% ethanol (v/v), and prior to  
461 embedding root samples were placed in 0.7% agar.

462

463 Fixed tissue was dehydrated and embedded in paraffin wax using a Tissue-Tek VIP machine  
464 (Sakura, [www.sakura.eu](http://www.sakura.eu)). Samples were dehydrated at 35°C through 70%, 80%, 90% (with 1%  
465 (w/v) eosin), 95% and three times 100% (all v/v) ethanol for 1 hour each. Samples were then  
466 incubated at 35°C in 3 times histoclear for 1 hour each. Finally, samples were wax-infiltrated by four  
467 incubations of 2 hours in paraffin at 65°C. Embedded tissue was then placed in wax blocks and left  
468 to solidify at 4°C overnight. Wax blocks were trimmed and 10µm transverse sections cut using a  
469 Leica RM2135 rotary microtome and placed on slides at 37°C to dry overnight.

470

## 471 **Toluidine blue staining of root sections**

472 Slides were placed in histoclear twice for 10 min each to remove wax, before being taken through  
473 an ethanol re-hydration series (1 min in each). Slides were stained in 0.05% (w/v) Toluidine blue  
474 (50mM citrate buffer, pH 4.4) for 5 seconds, rinsed in dH<sub>2</sub>O and then dried and mounted using a  
475 drop of entellen (Merck Millipore). Images were taken using brightfield illumination as above.

476

## 477 ***In situ* hybridization**

478 *In situ* hybridization was carried out using wax-embedded shoot apices as described by Schuler et  
479 al., 2018, with digoxigenin (DIG)-labelled RNA probes designed to specifically detect either  
480 *ZmSCR1* or *ZmSCR1h* transcripts (Fig. S3). The *ZmSCR1* probe was a 108bp region towards the  
481 end of the first exon, which shared 78% identity with the corresponding region of *ZmSCR1h*. The  
482 *ZmSCR1h* probe was a different 108bp region in the 3'UTR. The current predicted gene-model for  
483 *ZmSCR1* does not include the majority of this 3'UTR region (Phytozome12), and as such the probe  
484 should be highly specific for *ZmSCR1h*. If this gene-model is incorrect, and *ZmSCR1* encodes a  
485 longer 3'UTR, then the *ZmSCR1h* probe shares 63% sequence identity with the *ZmSCR1* gene (Fig.  
486 S3). Post-hybridization washes were undertaken with 0.005x (*ZmSCR1*) and 0.01x (*ZmSCR1h*) SSC  
487 buffer made from a 20x SSC stock (3M NaCl, 0.3M Na<sub>3</sub>citrate), calculated to ensure stringency.

488

## 489 **Immunolocalization**

490 Slides were dewaxed twice for 10 min in histoclear, then transferred through 99% (x2), 95% and  
491 85% ethanol (all v/v) for 2 min each. Slides were incubated in 3% (v/v) H<sub>2</sub>O<sub>2</sub> in methanol for 15 min,  
492 and rehydrated through 70%, 50% and 30% ethanol (all v/v) and finally dH<sub>2</sub>O twice. Slides were then  
493 incubated in PBS/BSA buffer (0.15M NaCl, 10mM phosphate buffer pH 7, 1mgml<sup>-1</sup> BSA) for 5 min,  
494 drained and incubated for 15 min in 0.1% (w/v) Goat IgG (Sigma Aldrich) (in PBS/BSA) and rinsed  
495 in PBS/BSA. Slides were then incubated for 15 min with a 1/1000 dilution (in PBS/BSA) of ZmNADP-  
496 ME antibody (Langdale et al., 1987), before being rinsed twice for 15 min each in PBS/BSA and  
497 incubated for 15 min in a 1/100 dilution (in PBS/BSA) of biotinylated goat anti-rabbit secondary  
498 antibody (Sigma Aldrich). Slides were rinsed as before and incubated with a 1/100 dilution (in  
499 PBS/BSA) of biotinylated/streptavidin/horseradish peroxidase complex (GE Healthcare) before a  
500 final PBS/BSA rinse. SIGMAFAST™ 3,3'-Diaminobenzidine (DAB) tablets (Sigma Aldrich) were used  
501 to prepare a staining solution as per the manufacturer's instructions including 0.03% (w/v) NiCl<sub>2</sub>.  
502 Slides were covered in staining solution and observed until colour had developed sufficiently (usually  
503 ~1 min), before being rinsed in dH<sub>2</sub>O and dehydrated through the original ethanol series. Finally,  
504 slides were mounted using DPX (Sigma Aldrich) and visualized using brightfield microscopy in the  
505 same way described for leaf and root histology.

506

## 507 **Quantification and statistics**

508 Quantification of leaf segment width was undertaken using the ImageJ software package  
509 ([www.imagej.nih.gov](http://www.imagej.nih.gov)). Statistical analysis was undertaken using RStudio ([www.rstudio.com](http://www.rstudio.com)).  
510 Student's t-tests were used to test for differences in leaf length, leaf width, midvein extension, vein  
511 density and vein order ratios between mutants and the corresponding segregating WT lines.  
512 Standard errors of the mean were calculated for M and BS data.

513

## 514 **Phylogeny construction**

515 Primary transcript proteomes from eleven species were downloaded from Phytozome12 (Goodstein  
516 et al., 2012); *Zea mays* (B73), *Sorghum bicolor*, *Setaria italica*, *Setaria viridis*, *Oryza sativa*,  
517 *Brachypodium distachyon* and *stacei*, and *Ananas comosus* were chosen for monocots, *Arabidopsis*  
518 *thaliana* and *Solanum lycopersicum* for dicots and *Physcomitrella patens* as an outgroup. The  
519 ZmSCR1 (GRMZM2G131516) primary protein sequence was used as a query in a BLASTp search  
520 (evalue of 1e-3) against this proteome database, with the top 100 hits retained. The gene model  
521 from one sorghum SCR ortholog (Sobic008G023401.1) was incorrect, as it was predicted to begin  
522 without a start codon. The upstream region of this sequence was interrogated, and an in-frame start  
523 codon was identified. No suitable expression data were available to validate this corrected gene  
524 model, but as the original model was definitely incorrect, the new version was used for alignment.  
525 The 100 sequences were aligned using MergeAlign (Collingridge and Kelly, 2012), and the resultant



526 alignment (File S1) was used to generate a maximum likelihood phylogeny using IQtree (Hoang et  
527 al., 2018; Trifinopoulos et al., 2016). In parallel, the alignment was trimmed using trimAl to remove  
528 poorly aligned regions, such that columns with less than 30% of the sequences represented were  
529 discounted from further analysis (Capella-Gutiérrez et al., 2009). Trimming did not alter the topology  
530 of the resultant tree, and as such the untrimmed version is presented here. Trees were visualized  
531 using the Interactive Tree of Life (iTOL) software (Letunic and Bork, 2016).

532

### 533 **ACKNOWLEDGEMENTS**

534 We thank the UniformMu project and the Maize Genetics Stock Centre for providing the original seed  
535 stocks; Daniela Vlad and Julia Lambret Frotte for helpful discussions throughout the work and during  
536 the course of manuscript preparation; Erik Vollbrecht, Rubén Rellán-Álvarez and Ruairidh Sawers  
537 for help with crossing and fieldwork; John Baker for plant photography and Julie Bull for technical  
538 support. TEH and JAL wrote the manuscript with all authors contributing to the final draft.

539

### 540 **COMPETING INTERESTS**

541 No competing interests declared.

542

### 543 **FUNDING**

544 This work was funded by a grant (C<sub>4</sub> Rice) from the Bill & Melinda Gates Foundation to the University  
545 of Oxford (2015–2019; OPP1129902). Additional awards supported TEH (University of Oxford  
546 Newton Abraham Scholarship) and OVS (University of Oxford Clarendon and Somerville College  
547 Scholarships). HW and PWB were funded by a grant from the U.S. National Science Foundation  
548 (IOS-1444568).

### 549 **AUTHOR CONTRIBUTIONS**

550 TEH carried out genotyping, phenotypic characterization and data analysis; OVS undertook in situ  
551 hybridization; HW and PWB assisted with crossing and fieldwork support; JAL conceived the study  
552 and provided funding.

553 **REFERENCES**

- 554 **Adams, K. L. and Wendel, J. F.** (2005). Polyploidy and genome evolution in plants. *Curr. Opin.*  
555 *Plant Biol.* **8**, 135–41.
- 556 **Blanc, G. and Wolfe, K. H.** (2004). Widespread Paleopolyploidy in Model Plant Species Inferred  
557 from Age Distributions of Duplicate Genes. *Plant Cell* **16**, 1667–1678.
- 558 **Bosabalidis, A. M., Evert, R. F. and Russin, W. A.** (1994). Ontogeny of the Vascular Bundles and  
559 Contiguous Tissues in the Maize Leaf Blade. *Am. J. Bot.* **81**, 745–752.
- 560 **Capella-Gutiérrez, S., Silla-Martínez, J. M. and Gabaldón, T.** (2009). trimAl: a tool for automated  
561 alignment trimming in large-scale phylogenetic analyses. *Bioinformatics* **25**, 1972–3.
- 562 **Chang, Y.-M., Liu, W.-Y., Shih, A. C.-C., Shen, M.-N., Lu, C.-H., Lu, M.-Y. J., Yang, H.-W., Wang,**  
563 **T.-Y., Chen, S. C.-C., Chen, S. M., et al.** (2012). Characterizing regulatory and functional  
564 differentiation between maize mesophyll and bundle sheath cells by transcriptomic analysis.  
565 *Plant Physiol.* **160**, 165–177.
- 566 **Clark, L. H. and Harris, W. H.** (1981). Observations on the Root Anatomy of Rice (*Oryza sativa* L.).  
567 *Am. J. Bot.* **68**, 154-61.
- 568 **Collingridge, P. W. and Kelly, S.** (2012). MergeAlign: improving multiple sequence alignment  
569 performance by dynamic reconstruction of consensus multiple sequence alignments. *BMC*  
570 *Bioinformatics* **13**, 117.
- 571 **Cui, H., Levesque, M. P., Vernoux, T., Jung, J. W., Paquette, A. J., Gallagher, K. L., Wang, J.**  
572 **Y., Blilou, I., Scheres, B. and Benfey, P. N.** (2007). An evolutionarily conserved mechanism  
573 delimiting SHR movement defines a single layer of endodermis in plants. *Science* **316**, 421–5.
- 574 **Cui, H., Kong, D., Liu, X. and Hao, Y.** (2014). SCARECROW, SCR-LIKE 23 and SHORT-ROOT  
575 control bundle sheath cell fate and function in *Arabidopsis thaliana*. *Plant J.* **78**, 319–27.
- 576 **Denton, A. K., Maß, J., Külahoglu, C., Lercher, M. J., Bräutigam, A. and Weber, A. P. M.** (2017).  
577 Freeze-quenched maize mesophyll and bundle sheath separation uncovers bias in previous  
578 tissue-specific RNA-Seq data. *J. Exp. Bot.* **68**, 147–160.
- 579 **Di Laurenzio, L., Wysocka-Diller, J., Malamy, J., Pysh, L., Helariutta, Y., Freshour, G., Hahn,**  
580 **M. G., Feldmann, K. A. and Benfey, P. N.** (1996). The SCARECROW gene regulates an  
581 asymmetric cell division that is essential for generating the radial organization of the  
582 *Arabidopsis* root. *Cell* **86**, 423–433.
- 583 **Dolan, L., Janmaat, K., Willemsen, V., Linstead, P., Poethig, S., Roberts, K. and Scheres, B.**  
584 (1993). Cellular organisation of the *Arabidopsis thaliana* root. *Development* **119**, 71–84.
- 585 **Ehleringer, J. R., Cerling, T. E. and Helliker, B. R.** (1997). C<sub>4</sub> photosynthesis, atmospheric CO<sub>2</sub>  
586 and climate. *Oecologia* **112**, 285–299.
- 587 **Esau, K.** (1943). Ontogeny of the Vascular Bundle in *Zea Mays*. *Hilgardia* **15**, 325–368.
- 588 **Fouracre, J. P., Ando, S. and Langdale, J. A.** (2014). Cracking the Kranz enigma with systems  
589 biology. *J. Exp. Bot.* **65**, 3327–39.
- 590 **Gallagher, K. L. and Benfey, P. N.** (2009). Both the conserved GRAS domain and nuclear

- 591 localization are required for SHORT-ROOT movement. *Plant J.* **57**, 785–97.
- 592 **Goodstein, D. M., Shu, S., Howson, R., Neupane, R., Hayes, R. D., Fazo, J., Mitros, T., Dirks,**  
593 **W., Hellsten, U., Putnam, N., et al.** (2012). Phytozome: a comparative platform for green plant  
594 genomics. *Nucleic Acids Res.* **40**, D1178–D1186.
- 595 **Henry, S., Dievart, A., Divol, F., Pauluzzi, G., Meynard, D., Swarup, R., Wu, S., Gallagher, K. L.**  
596 **and Périn, C.** (2017). SHR overexpression induces the formation of supernumerary cell layers  
597 with cortex cell identity in rice. *Dev. Biol.* **425**, 1–7.
- 598 **Hibberd, J. M., Sheehy, J. E. and Langdale, J. A.** (2008). Using C<sub>4</sub> photosynthesis to increase the  
599 yield of rice—rationale and feasibility. *Curr. Opin. Plant Biol.* **11**, 228–231.
- 600 **Hoang, D. T., Chernomor, O., von Haeseler, A., Minh, B. Q. and Vinh, L. S.** (2018). UFBoot2:  
601 Improving the Ultrafast Bootstrap Approximation. *Mol. Biol. Evol.* **35**, 518–522.
- 602 **Hochholdinger, F., Yu, P. and Marcon, C.** (2018). Genetic Control of Root System Development  
603 in Maize. *Trends Plant Sci.* **23**, 79–88.
- 604 **Jankovsky, J. P., Smith, L. G. and Nelson, T.** (2001). Specification of bundle sheath cell fates  
605 during maize leaf development: roles of lineage and positional information evaluated through  
606 analysis of the tangled1 mutant. *Development* **128**, 2747–53.
- 607 **Kamiya, N., Itoh, J.-I., Morikami, A., Nagato, Y. and Matsuoka, M.** (2003). The SCARECROW  
608 gene's role in asymmetric cell divisions in rice plants. *Plant J.* **36**, 45–54.
- 609 **Langdale, J. A.** (2011). C<sub>4</sub> cycles: past, present, and future research on C<sub>4</sub> photosynthesis. *Plant*  
610 *Cell* **23**, 3879–92.
- 611 **Langdale, J. A., Metzler, M. C. and Nelson, T.** (1987). The argentia mutation delays normal  
612 development of photosynthetic cell-types in *Zea mays*. *Dev. Biol.* **122**, 243–255.
- 613 **Langdale, J. A., Lane, B., Freeling, M. and Nelson, T.** (1989). Cell lineage analysis of maize  
614 bundle sheath and mesophyll cells. *Dev. Biol.* **133**, 128–39.
- 615 **Letunic, I. and Bork, P.** (2016). Interactive tree of life (iTOL) v3: an online tool for the display and  
616 annotation of phylogenetic and other trees. *Nucleic Acids Res.* **44**, W242–W245.
- 617 **Li, P., Ponnala, L., Gandotra, N., Wang, L., Si, Y., Tausta, S. L., Kebrom, T. H., Provart, N.,**  
618 **Patel, R., Myers, C. R., et al.** (2010). The developmental dynamics of the maize leaf  
619 transcriptome. *Nat. Genet.* **42**, 1060–7.
- 620 **Lim, J., Jung, J. W., Lim, C. E., Lee, M.-H., Kim, B. J., Kim, M., Bruce, W. B. and Benfey, P. N.**  
621 (2005). Conservation and diversification of SCARECROW in maize. *Plant Mol. Biol.* **59**, 619–  
622 30.
- 623 **McCarty, D. R., Settles, A. M., Suzuki, M., Tan, B. C., Latshaw, S., Porch, T., Robin, K., Baier,**  
624 **J., Avigne, W., Lai, J., et al.** (2005). Steady-state transposon mutagenesis in inbred maize.  
625 *Plant J.* **44**, 52–61.
- 626 **Messing, J., Bharti, A. K., Karlowski, W. M., Gundlach, H., Kim, H. R., Yu, Y., Wei, F., Fuks, G.,**  
627 **Soderlund, C. A., Mayer, K. F., et al.** (2004). Sequence composition and genome organization  
628 of maize. *Proc. Natl. Acad. Sci.* **101**, 14349–14354.

- 629 **Moore, R. C. and Purugganan, M. D.** (2005). The evolutionary dynamics of plant duplicate genes.  
630 *Curr. Opin. Plant Biol.* **8**, 122–8.
- 631 **Murray, M. G. and Thompson, W. F.** (1980). Rapid isolation of high molecular weight plant DNA.  
632 *Nucleic Acids Res.* **8**, 4321–4326.
- 633 **Nelson, T.** (2011). The grass leaf developmental gradient as a platform for a systems understanding  
634 of the anatomical specialization of C<sub>4</sub> leaves. *J. Exp. Bot.* **62**, 3039–48.
- 635 **Ohno, S.** (1970). *Evolution by Gene Duplication*. Springer.
- 636 **Russell, S. H. and Evert, R. F.** (1985). Leaf vasculature in *Zea mays* L. *Planta* **164**, 448–458.
- 637 **Sage, R. F., Christin, P.-A. and Edwards, E. J.** (2011). The C<sub>4</sub> plant lineages of planet Earth. *J.*  
638 *Exp. Bot.* **62**, 3155–69.
- 639 **Schnable, P. S., Ware, D., Fulton, R. S., Stein, J. C., Wei, F., Pasternak, S., Liang, C., Zhang,**  
640 **J., Fulton, L., Graves, T. A., et al.** (2009). The B73 maize genome: complexity, diversity, and  
641 dynamics. *Science.* **326**, 1112–1115.
- 642 **Schnable, J. C., Springer, N. M. and Freeling, M.** (2011). Differentiation of the maize subgenomes  
643 by genome dominance and both ancient and ongoing gene loss. *Proc. Natl. Acad. Sci.* **108**,  
644 4069–4074.
- 645 **Schuler, M. L., Sedelnikova, O. V., Walker, B. J., Westhoff, P. and Langdale, J. A.** (2018).  
646 SHORTROOT-Mediated Increase in Stomatal Density Has No Impact on Photosynthetic  
647 Efficiency. *Plant Physiol.* **176**, 757–772.
- 648 **Sedelnikova, O. V., Hughes, T. E. and Langdale, J. A.** (2018). Understanding the Genetic Basis  
649 of C<sub>4</sub> Kranz Anatomy with a View to Engineering C<sub>3</sub> Crops. *Annu. Rev. Genet.* **52**, 249–270.
- 650 **Sharman, B.** (1942). Developmental anatomy of the shoot of *Zea mays* L. *Ann. Bot.* **6**, 245–281.
- 651 **Slewinski, T. L.** (2013). Using evolution as a guide to engineer kranz-type C<sub>4</sub> photosynthesis. *Front.*  
652 *Plant Sci.* **4**, 212.
- 653 **Slewinski, T. L., Anderson, A. A., Zhang, C. and Turgeon, R.** (2012). Scarecrow plays a role in  
654 establishing Kranz anatomy in maize leaves. *Plant Cell Physiol.* **53**, 2030–7.
- 655 **Strable, J., Wallace, J. G., Unger-Wallace, E., Briggs, S., Bradbury, P. J., Buckler, E. S. and**  
656 **Vollbrecht, E.** (2017). Maize YABBY Genes drooping leaf1 and drooping leaf2 Regulate Plant  
657 Architecture. *Plant Cell* **29**, 1622–1641.
- 658 **Swigonova, Z., Lai, J., Ma, J., Ramakrishna, W., Llaca, V., Bennetzen, J. L. and Messing, J.**  
659 (2004). Close split of sorghum and maize genome progenitors. *Genome Res.* **14**, 1916–1923.
- 660 **Tausta, S. L., Li, P., Si, Y., Gandotra, N., Liu, P., Sun, Q., Brutnell, T. P. and Nelson, T.** (2014).  
661 Developmental dynamics of Kranz cell transcriptional specificity in maize leaf reveals early  
662 onset of C<sub>4</sub>-related processes. *J. Exp. Bot.* **65**, 3543–55.
- 663 **Trifinopoulos, J., Nguyen, L.-T., von Haeseler, A. and Minh, B. Q.** (2016). W-IQ-TREE: a fast  
664 online phylogenetic tool for maximum likelihood analysis. *Nucleic Acids Res.* **44**, W232–W235.
- 665 **von Caemmerer, S., Quick, W. P. and Furbank, R. T.** (2012). The development of C<sub>4</sub> rice: current  
666 progress and future challenges. *Science* **336**, 1671–1672.

- 667 **Wang, P., Kelly, S., Fouracre, J. P. and Langdale, J. A.** (2013). Genome-wide transcript analysis  
668 of early maize leaf development reveals gene cohorts associated with the differentiation of C<sub>4</sub>  
669 Kranz anatomy. *Plant J.* **75**, 656–670.
- 670 **Wang, P., Vlad, D. and Langdale, J. A.** (2016). Finding the genes to build C<sub>4</sub> rice. *Curr. Opin. Plant*  
671 *Biol.* **31**, 44–50.
- 672 **Wang, P., Karki, S., Biswal, A. K., Lin, H.-C., Dionora, M. J., Rizal, G., Yin, X., Schuler, M. L.,**  
673 **Hughes, T., Fouracre, J. P., et al.** (2017). Candidate regulators of Early Leaf Development in  
674 Maize Perturb Hormone Signalling and Secondary Cell Wall Formation When Constitutively  
675 Expressed in Rice. *Sci. Rep.* **7**, 4535.
- 676 **Wu, S., Lee, C.-M., Hayashi, T., Price, S., Divol, F., Henry, S., Pauluzzi, G., Perin, C. and**  
677 **Gallagher, K. L.** (2014). A plausible mechanism, based upon Short-Root movement, for  
678 regulating the number of cortex cell layers in roots. *Proc. Natl. Acad. Sci.* **111**, 16184–9.
- 679 **Wysocka-Diller, J. W., Helariutta, Y., Fukaki, H., Malamy, J. E. and Benfey, P. N.** (2000).  
680 Molecular analysis of SCARECROW function reveals a radial patterning mechanism common  
681 to root and shoot. *Development* **127**, 595–603.
- 682 **Yi, G., Neelakandan, A. K., Gontarek, B. C., Vollbrecht, E. and Becraft, P. W.** (2015). The naked  
683 endosperm genes encode duplicate INDETERMINATE domain transcription factors required  
684 for maize endosperm cell patterning and differentiation. *Plant Physiol.* **167**, 443–56.

685 **FIGURE LEGENDS**

686

687 **Figure 1. Transposon insertions in maize *AtSCR* orthologs.** **A)** Maximum likelihood phylogeny  
688 of *SCR* genes. Bootstrap values are indicated below branches. Light blue shading indicates the  
689 *AtSCR* clade, light orange shading indicates the *AtSCL23* clade. *Physcomitrella patens* sequences  
690 were included as an outgroup. **B)** Cartoon depiction of *Mutator* transposon insertions in *ZmSCR1*  
691 and *ZmSCR1h*. All three alleles were in the W22 inbred background from the UniformMu project.  
692 UTRs (green), exons (orange), introns (black line) and transposon insertion site (blue triangle) are  
693 indicated.

694

695

696 **Figure 2. Phenotype of *Zmscr1* and *Zmscr1h* single mutants.** **A-D)** Representative whole plant  
697 phenotype at 32 days after planting. **E-H)** Representative transverse sections of fully expanded leaf  
698 5 of WT (E), *Zmscr1-m2* (F) *Zmscr1h-m1* (G) and *Zmscr1h-m2* (H) plants. **I)** Quantification of mean  
699 % of M cells between vein pairs. In each case, the WT plot on the left represents a segregating  
700 sibling from the same family as the mutant presented in the corresponding plot on the right. Error  
701 bars are standard errors of the mean. **J)** Quantification of vein density and the ratio of rank1 to rank  
702 2 intermediate veins in leaf 5. In each case, data from segregating WT (left) and corresponding  
703 mutant (right) are presented. Means are indicated by red crosses. Statistical significance between  
704 WT and mutant was assessed using Student's t-tests (two-tailed): ns = no significant difference; \*  
705 indicates  $p \leq 0.05$ . **K)** Quantification of mean number of supernumerary BS cells in leaf 5. In each  
706 case, data from segregating WT (top) and corresponding mutant (bottom) are presented. s.e.m  
707 indicates standard error of the mean. **L-O)** Representative transverse sections of seminal roots of  
708 WT (L), *Zmscr1-m2* (M) *Zmscr1h-m1* (N) and *Zmscr1h-m2* (O) plants. Arrows indicate the  
709 endodermal layer positioned between vasculature and cortex. Scale bars = 10cm (A-D); 100 $\mu$ m (E-  
710 H & L-O)

711

712 **Figure 3. Growth is stunted in *Zmscr1;Zmscr1h* mutants.** **A-D)** 32 day old segregating WT (A,B)  
713 and *Zmscr1;Zmscr1h* double mutant siblings (C,D). Scale bars = 10cm.

714

715 **Figure 4. *ZmSCR1* and *ZmSCR1h* regulate endodermis formation during root development.**  
716 Representative transverse sections of roots from WT plants segregating in the *Zmscr1-m2;Zmscr1h-*  
717 *m1* background (A, D) plus *Zmscr1-m2;Zmscr1h-m1* (B, E) and *Zmscr1-m2;Zmscr1h-m2* (C, F)  
718 double mutants. Sections were taken from the maturation zone of either primary roots 4 days after  
719 germination (A, B, D, E) or seminal roots 35 days after germination (C, F). D, E and F are  
720 enlargements of the area indicated by the rectangle in the corresponding whole root image in the  
721 panel above. Cortex (co) and endodermis (en) are indicated. Scale bars = 100 $\mu$ m.

722

723 **Figure 5. *Zmscr1*;*Zmscr1h* mutants form supernumerary BS cells. A-B)** Representative fresh  
724 cut transverse sections of fully expanded leaf 5 from WT (*m2m1* segregant) (A) and *Zmscr1*-  
725 *m2*;*Zmscr1h-m1* mutant (B) plants. **C)** Quantification of the frequency of extra BS cells in different  
726 mutant backgrounds. s.e.m indicates standard error of the mean. WT (*m2m1*) data are also  
727 presented in Fig. 2K. **D-G)** Immunolocalization of ZmNADP-ME in BS cell chloroplasts of WT (*m2m1*  
728 segregant – D; *m2m2* segregant - F), *Zmscr1-m2*;*Zmscr1h-m1* (E) and *Zmscr1-m2*; *Zmscr1h-m2*  
729 (G) leaves. Arrows in B, F and G indicate extra BS cells that are not in contact with the vasculature.  
730 Scale bars = 100µm.

731  
732 **Figure 6. *ZmSCR1* and *ZmSCR1h* regulate divisions of M cell precursors. A-H)** *In situ*  
733 hybridization of *ZmSCR1* (A-C) and *ZmSCR1h* (D-H) in developing leaf primordia. Plastochron (P)  
734 numbers are indicated by coloured outlines: red = P3; purple = P4; green = P5 (A and D). Higher  
735 magnification P4 cross sections were imaged under both brightfield (B, E, G) and UV (C, F, H)  
736 illumination to show hybridization signal and calcofluor staining of cell walls respectively. Closed  
737 black and white arrows indicate single M precursor cells separating developing veins, open yellow  
738 arrows indicate two M precursor cells separating developing veins. Scale bars = 50µm (A-H). **I-K)**  
739 Representative fresh transverse sections of WT (*m2m1* segregant) (I), *Zmscr1-m2*;*Zmscr1h-m1* (J)  
740 and *Zmscr1-m2*;*Zmscr1h-m2* (K) fully expanded leaf 5. Scale bars = 100µm. Numbers below each  
741 section are the number of M cells separating the vascular bundles. Note that (I) is the same image  
742 as Fig. 5A. **L)** Quantification of the mean % of vascular bundles separated by 0-3 M cells in WT and  
743 *Zmscr1*;*Zmscr1h* fully expanded leaf 5. Error bars are standard error of the mean. **M)** Quantification  
744 of vein density in *Zmscr1*;*Zmscr1h* double mutants and corresponding WT segregants. Means are  
745 indicated by red crosses. Statistical significance between WT and mutants was assessed using  
746 Student's t-tests (two-tailed): \*\* indicates  $p \leq 0.01$ ; \*\*\* indicates  $p \leq 0.001$ . In (L) and (M) WT (*m2m1*)  
747 is also presented in Fig. 2I&J.

748  
749 **Figure 7. *Zmscr1*;*Zmscr1h* mutants form altered ratios of rank-1 to rank-2 intermediate veins.**  
750 **A-H)** Representative fresh cut transverse sections of fully expanded leaf 5 from WT (*m2m1*  
751 segregant – A, C; *m2m2* segregant – E, G) and mutant (*Zmscr1-m2*;*Zmscr1h-m1* – B, D; *Zmscr1*-  
752 *m2*;*Zmscr1h-m1* – F, H) leaves imaged under UV illumination to show fluorescence associated with  
753 lignin. White boxes in A, B, E and F indicate an area that is enlarged in C, D, G and H respectively.  
754 White arrows indicate rank-1 intermediate veins with accompanying lignified sclerenchyma. L  
755 indicates a lateral vein. Scale bars = 100µm. **E)** Quantification of the ratio of rank-1 to rank-2  
756 intermediate veins. Means are indicated by red crosses. Statistical significance between WT and  
757 mutants was assessed using Student's t-tests (two-tailed): \*\*\* indicates  $p \leq 0.001$ . WT (*m2m1*) data  
758 is also presented in Fig. 2J.

759  
760 **Supplemental Figure 1. Validation of insertion alleles. A)** Details of alleles provided by the

761 UniformMu project. **B)** Primers used in this study. **C)** Schematic representation of each mutant allele,  
762 with the position of genotyping primers indicated. **D)** Agarose gels showing fragments amplified from  
763 WT and mutant alleles of both *ZmSCR1* and *ZmSCR1h*, with different primer pairs as indicated.  
764 Genomic DNA was used as template in all cases. **E)** Agarose gels of fragments amplified from  
765 genomic DNA or cDNA (copy of RNA extracted from leaf primordia), using primer pairs as indicated.  
766 Transposon sequences are present in the transcripts of each mutant allele.

767

768 **Supplemental Figure 2.** Quantification of *Zmscr1;Zmscr1h* growth characteristics. **A-C)**  
769 Quantification of leaf blade length from ligule to tip (A); leaf width at the midpoint along the  
770 proximal/distal axis (B); and the % extension of the midvein (C). Quantification was undertaken either  
771 31 (*m2m1*) or 32 (*m2m2*) days after planting. Means are indicated by red crosses. Statistical  
772 significance between WT and mutants was assessed using Students t-tests (two-tailed): \*\* indicates  
773  $p \leq 0.01$ ; \*\*\* indicates  $p \leq 0.001$ . **D)** Quantification of the latest emerged leaf in segregating WT and  
774 *Zmscr1-m2;Zmscr1h-m1* mutants. **E)** Quantification of the total number of veins across the width of  
775 the leaf, calculated by multiplying leaf width by vein density. s.e.m indicates standard error of the  
776 mean.

777

778 **Supplemental Figure 3.** *In situ* hybridization probe design. **A)** Cartoon showing position of *ZmSCR1*  
779 and *ZmSCR1h* probes. Green indicates UTRs; orange indicates exons; black lines indicate introns;  
780 Red lines indicate hybridization probes. **B-D)** Alignment of the *ZmSCR1* probe with the *ZmSCR1h*  
781 gene sequence (B); the *ZmSCR1h* probe with the *ZmSCR1* annotated gene sequence (C); or the  
782 *ZmSCR1h* probe with the annotated *ZmSCR1* gene sequence and region downstream of the of the  
783 3'UTR end (D). Dark blue indicates identical sequence, light blue indicates differences.



Figure 1

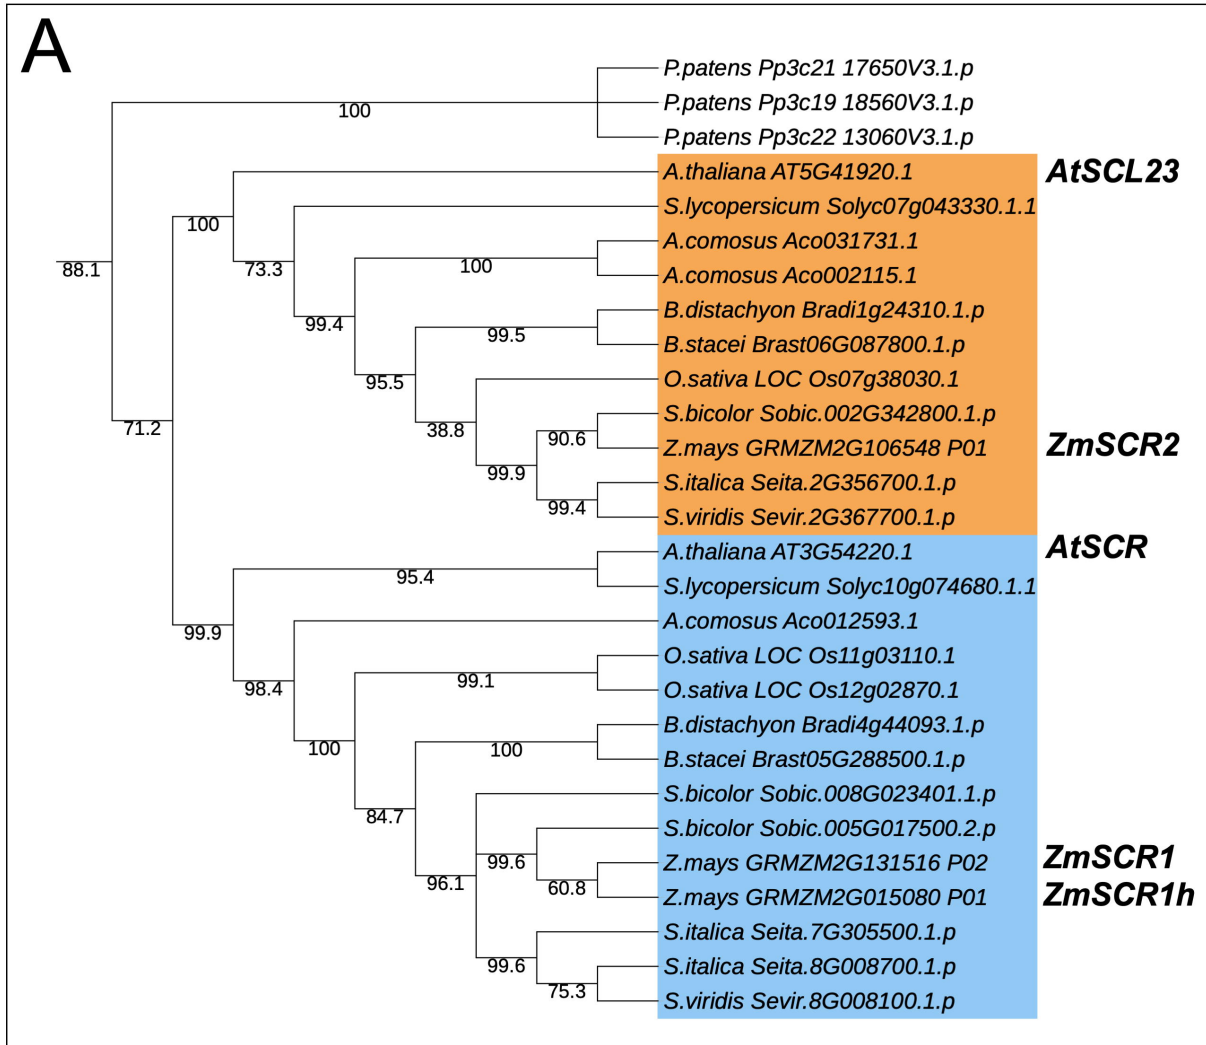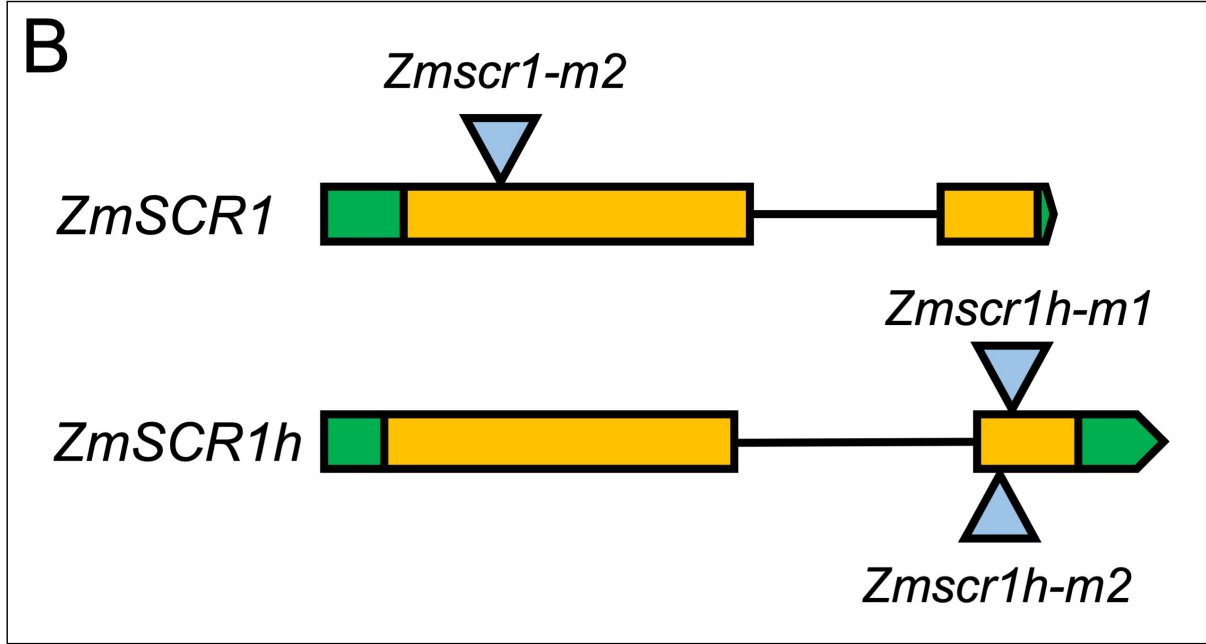



Figure 3

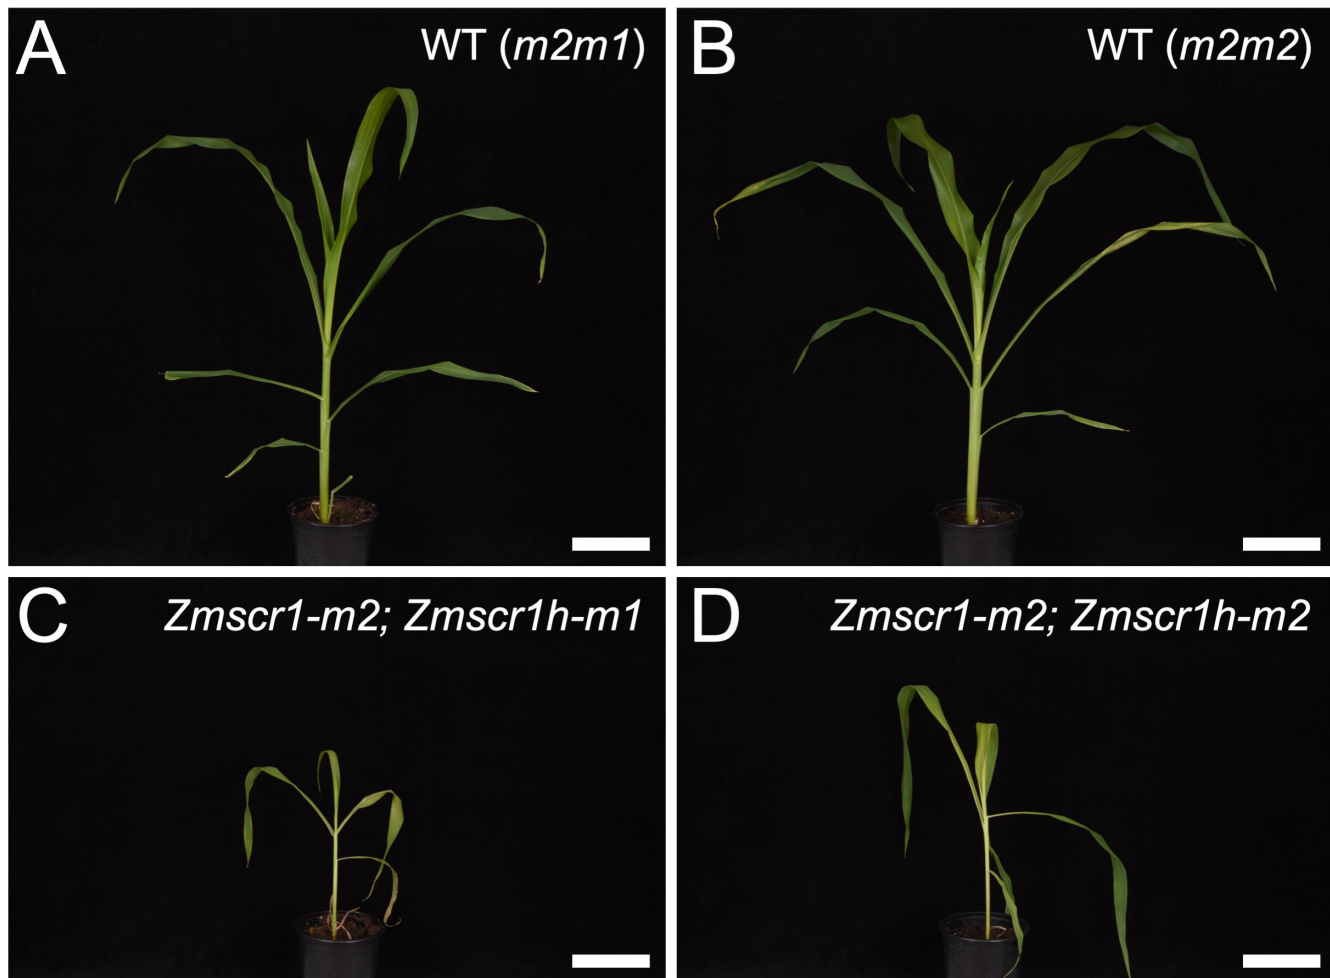

Figure 4

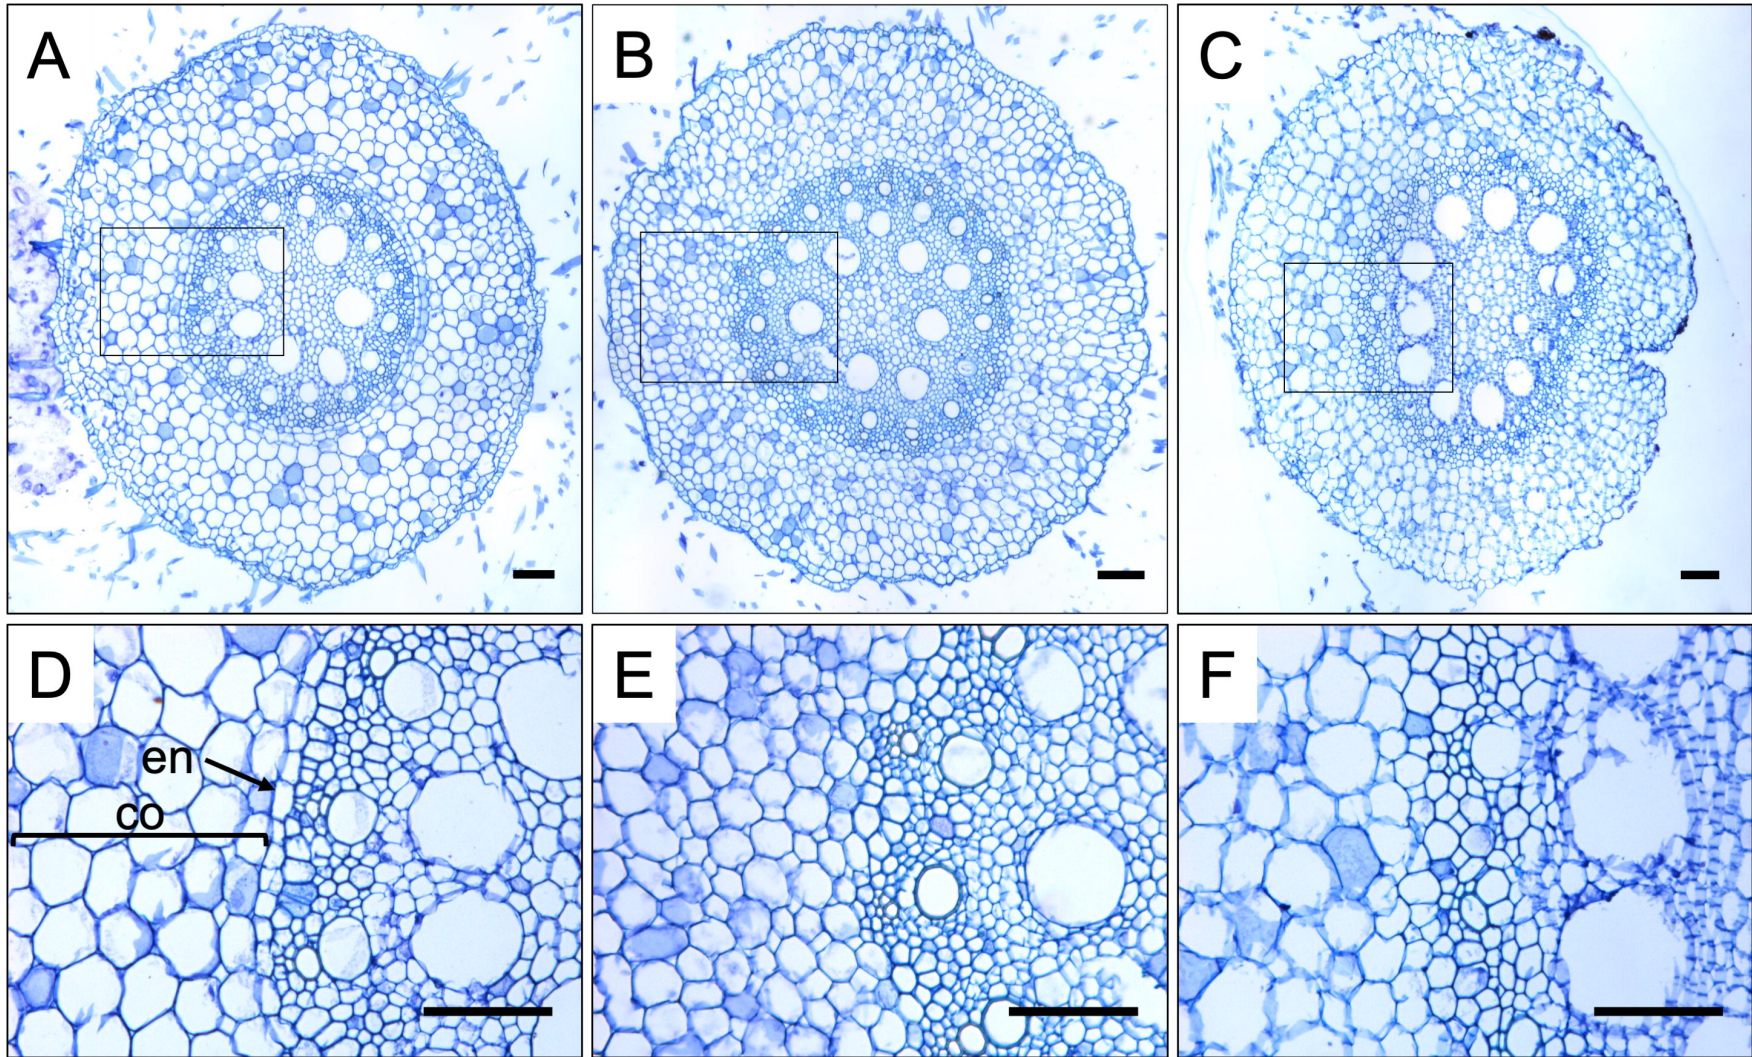

Figure 5

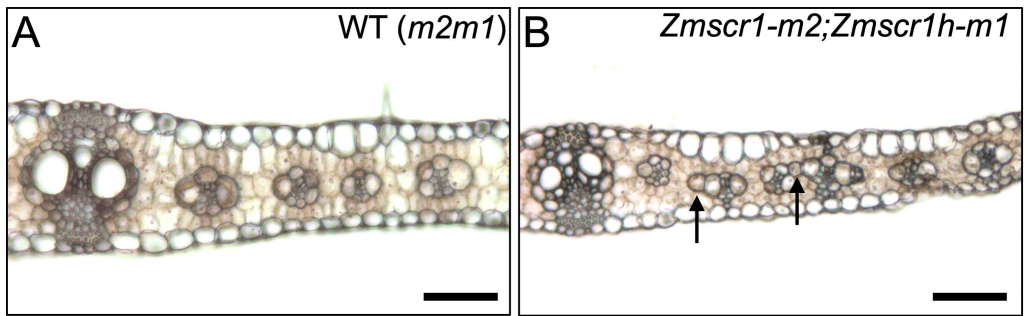

**C**

|                             | n | Total number of<br>supernumerary<br>BS cells | Mean % of veins with<br>supernumerary BS<br>cells ( $\pm$ s.e.m) |
|-----------------------------|---|----------------------------------------------|------------------------------------------------------------------|
| WT ( <i>m2m1</i> )          | 7 | 1                                            | 0.41 $\pm$ 0.41                                                  |
| <i>Zmscr1-m2;Zmscr1h-m1</i> | 7 | 22                                           | 7.21 $\pm$ 1.39                                                  |
| WT ( <i>m2m2</i> )          | 4 | 2                                            | 1.35 $\pm$ 1.32                                                  |
| <i>Zmscr1-m2;Zmscr1h-m2</i> | 5 | 17                                           | 8.39 $\pm$ 1.11                                                  |

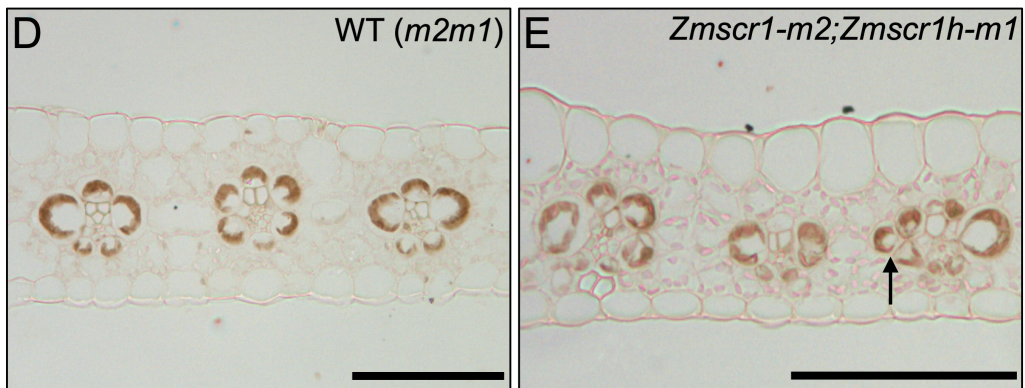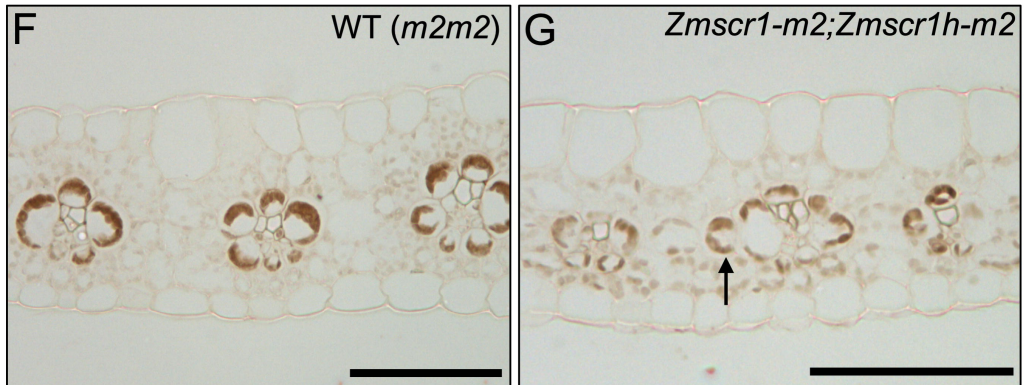

# Figure 6

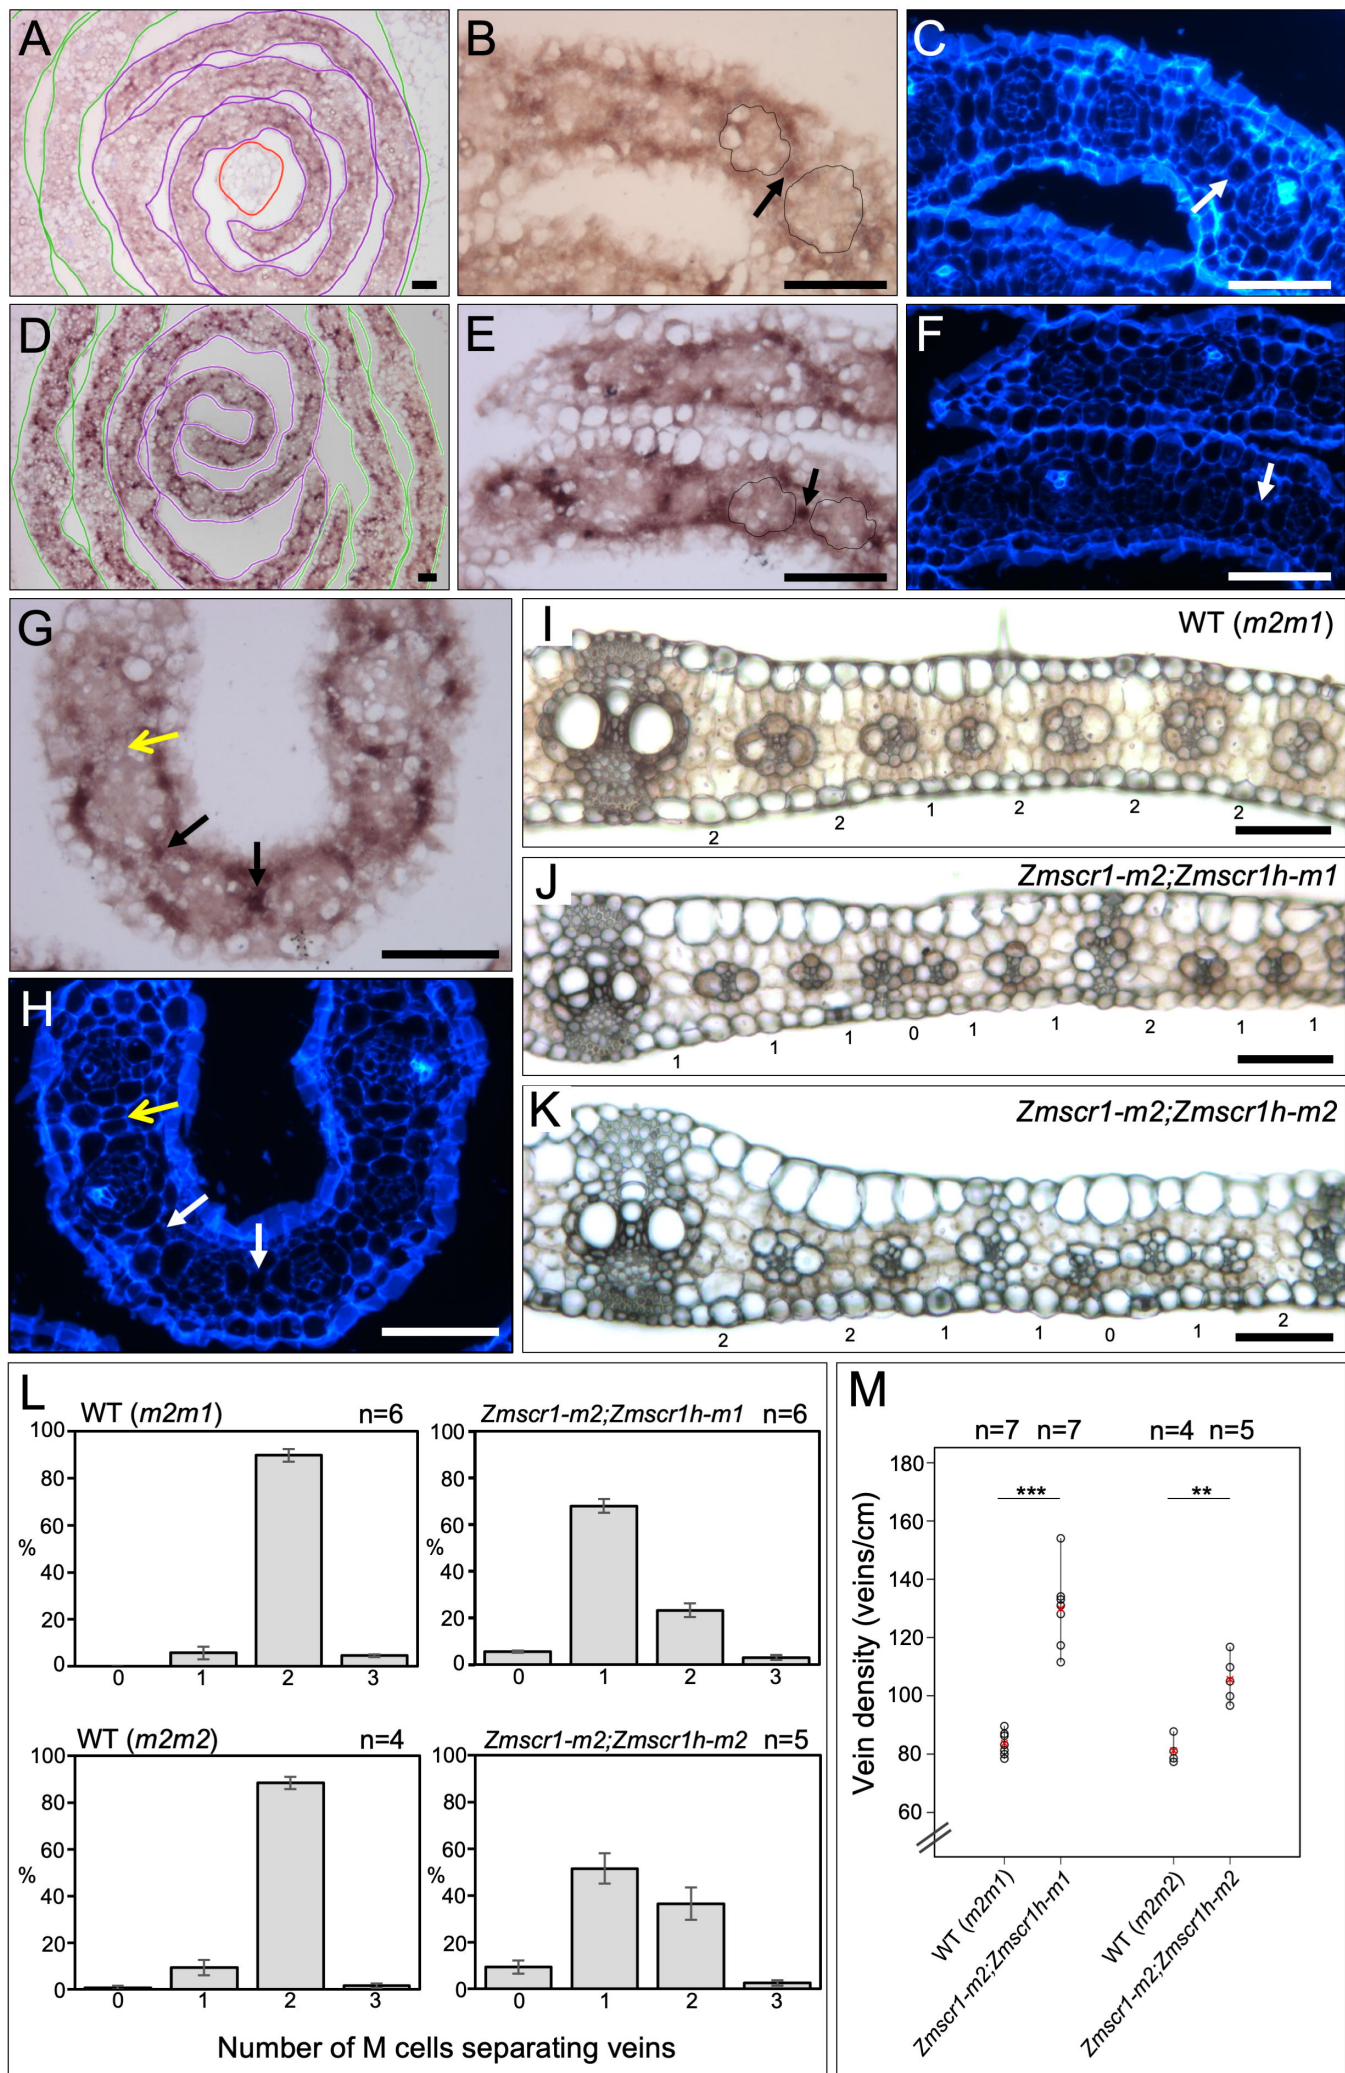

Figure 7

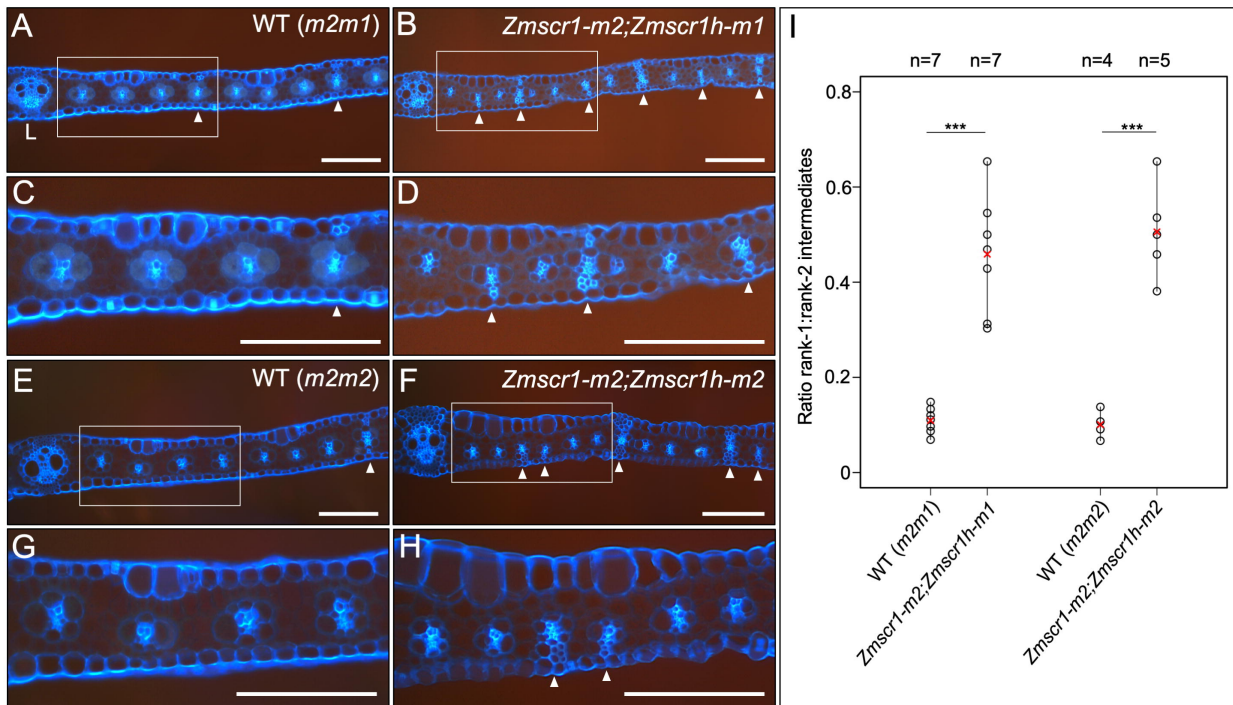

## A

| Gene           | Accession     | UniformMu ref | Seed stock | Allele name       | Other Mu insertions mapped in seed stock |
|----------------|---------------|---------------|------------|-------------------|------------------------------------------|
| <i>ZmSCR1</i>  | GRMZM2G131516 | mu1038565     | UFMu-03744 | <i>Zmscr1-m2</i>  | None                                     |
| <i>ZmSCR1h</i> | GRMZM2G015080 | mu1013874     | UFMu-01221 | <i>Zmscr1h-m1</i> | None                                     |
| <i>ZmSCR1h</i> | GRMZM2G015080 | mu1019839     | UFMu-01078 | <i>Zmscr1h-m2</i> | 4                                        |

## B

| Primer name | Sequence (5'-3')        | Primer pair          | Product size (bp)                                |
|-------------|-------------------------|----------------------|--------------------------------------------------|
| SCR1-F2     | CCTCCTCCTTCTCCCAA       | SCR1-F2/ EOMuMix     | 322                                              |
| EOMu1       | GCCTCCATTCGTGCGAATCCC   | SCR1-F4/ SCR1-AB1-R1 | 761                                              |
| EOMu2       | GCCTCTATTCGTGCGAATCCG   |                      |                                                  |
| SCR1-F4     | AACTCACCCCAACTCCACT     | SCR1h-F9/ EOMuMix    | <i>Zmscr1h-m1</i> -369<br><i>Zmscr1h-m2</i> -312 |
| SCR1-AB1-R1 | ATGAGCTGCGTGATGGAGAC    |                      |                                                  |
| SCR1h-F9    | CGCTAGCATTGTCGTTCTGGTAC | SCR1h-F11/ SCR1h-R11 | 588                                              |
| SCR1h-F11   | ACGCACATCCTGACTGACAG    |                      |                                                  |
| SCR1h-R11   | AGATCTACCACTGGCTGGGT    | SCR1h-R11/ EOMuMix   | <i>Zmscr1h-m1</i> -389<br><i>Zmscr1h-m2</i> -446 |
| ZmUbiCE-F   | TGCGTTAATCACGAGACAGG    |                      |                                                  |
| ZmUbiCE-R   | AATCACAAAGACAGGCAGGG    | ZmUbiCE-F/ZmUbiCE-R  | gDNA- 352<br>cDNA- 267                           |

## C

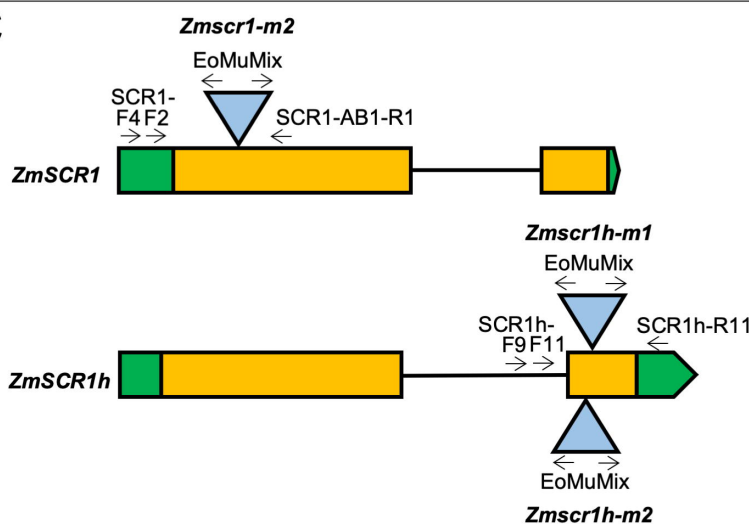

## D

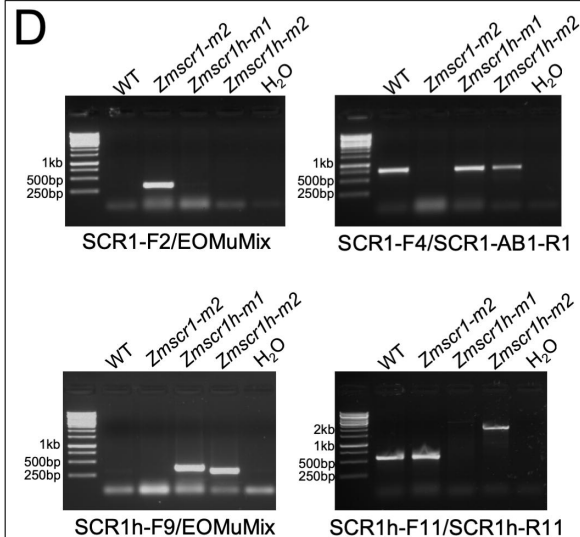

## E

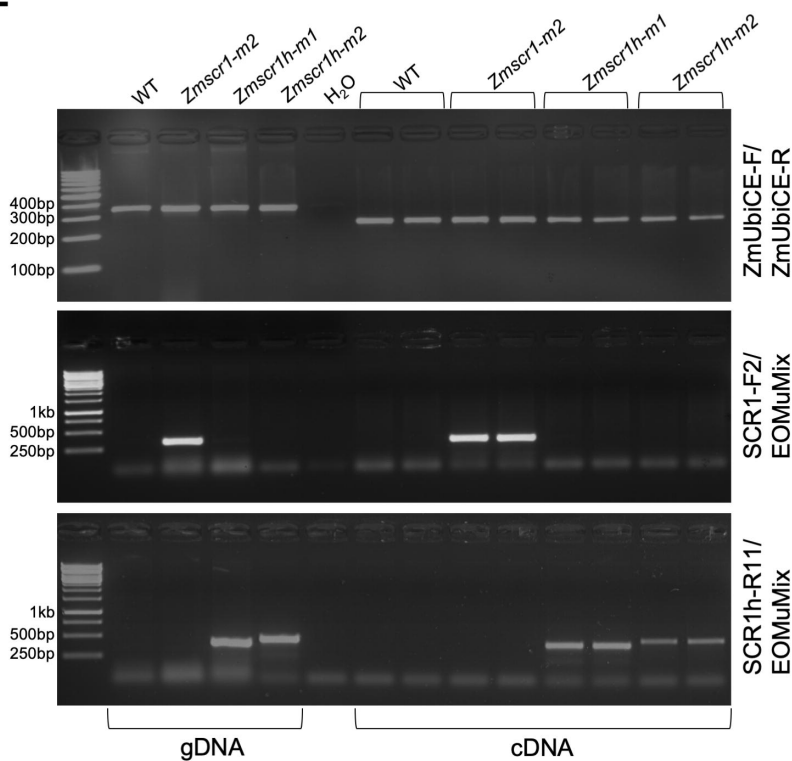



# Supplemental Figure 2

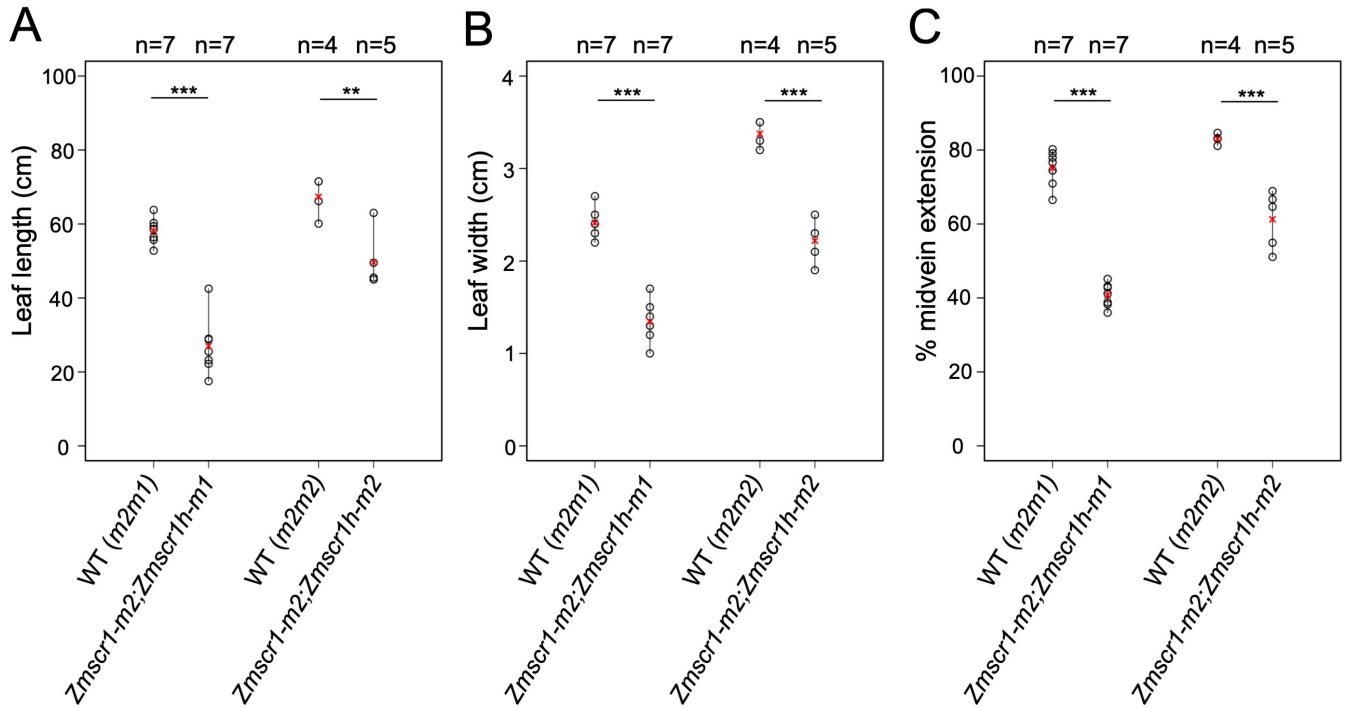

**D**

| Genotype                    | Latest emerged leaf 31 days after planting (n=7) | Mean | Mode |
|-----------------------------|--------------------------------------------------|------|------|
| WT ( <i>m2m1</i> )          | 8, 8, 8, 8, 7, 8, 8                              | 7.86 | 8    |
| <i>Zmscr1-m2;Zmscr1h-m1</i> | 6, 7, 6, 7, 7, 6, 7                              | 6.57 | 7    |

**E**

| Genotype                    | n | Total number of veins across leaf width ( $\pm$ s.e.m) |
|-----------------------------|---|--------------------------------------------------------|
| WT ( <i>m2m1</i> )          | 7 | 201.54 $\pm$ 3.13                                      |
| <i>Zmscr1-m2;Zmscr1h-m1</i> | 7 | 172.69 $\pm$ 8.54                                      |
| WT ( <i>m2m2</i> )          | 4 | 273.53 $\pm$ 5.51                                      |
| <i>Zmscr1-m2;Zmscr1h-m2</i> | 5 | 233.96 $\pm$ 11.13                                     |

# Supplemental Figure 3

**A**

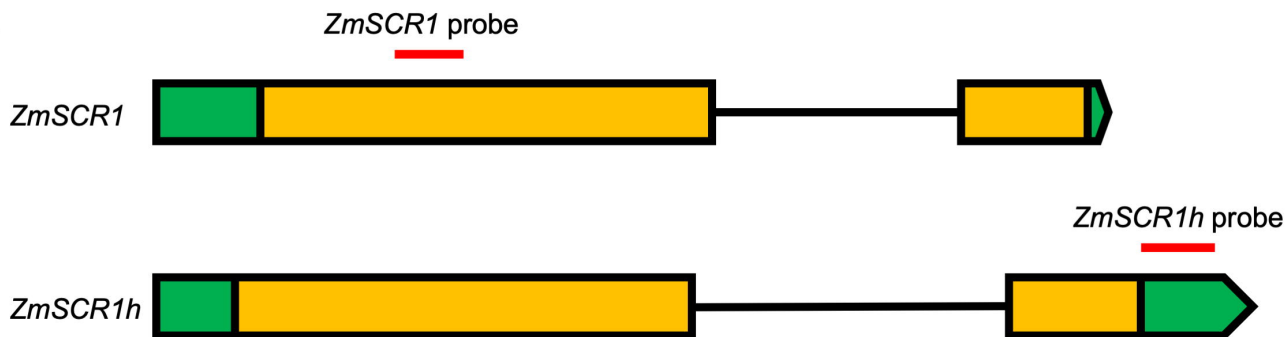

**B**

*ZmSCR1* probe  
*ZmSCR1h*

```

CGGACCGGGGAAGAGACCGCAGCGGGGGCGCCGCGCCACAAAGCAGCAGCTGCTGCGGCCGCCAAGGAGCGGAAGGAGGAGCAGCGGGCGGAAGCAGCGCGCAGGAGG
CGGACCGCGGAGGAGACCGCCGCGGCTC-----GGCCGCGCGGCCAAGGAGCGGAAGGAGGTGCAGCGGGCGGAAGCAGCGCGCAGGAGG
    
```

**C**

*ZmSCR1h* probe  
*ZmSCR1*

```

TGCCACTTCCTTTGTCATCTGTAGCTAGCTAGCTGGCTGCTCGATTGGTCTGCAGTTCGGAGATGGGAAAACGAAAACATCTCTTCTCGTCACTAATCGCTAGATCCA
CTCCACTTGTTTTGCATCTGTAGCTGC-----TGCTCGGTTTGGTGCATCAGCTGGGAGATAAGAAAACGCGAAAACCTACTAATTCGCTCTGGAGTAGATCCATCCA
    
```

↑  
 Annotated end of *ZmSCR1* 3'UTR

**D**

*ZmSCR1h* probe  
*ZmSCR1*

```

TGCCACTTCCTTTGTCATCTGTAGCTAGCTAGCTGGCTGCTCGATTGGTCTGCAGTTCAGTTCGGAGATGGGAAAACGAAAACATCTCTTCTCGTCACTAATCGCTAGATCCA
CTCCACTTGTTTTGCATCTGTAGC-----TGCTCGGTTTGGTGCATCAGCTGGGAGATAAGAAAACGCGAAAACCTACTAATTCGCTCTGGAGTAGATCCATCCA
    
```
